# Supplementary material for: Examining Canadian Equine Industry Participants’ Perceptions of Horses and Their Welfare
Source: Animals (Basel). 2018 Nov 7;8(11):201. doi: 10.3390/ani8110201 (PMC6262281; doi:10.3390/ani8110201)
Supplement: Supplementary file 1 [file animals-08-00201-s001.zip › S1RawDataNoDemographics.xlsx]

## Sheet: Sheet1
Response ID	The primary purpose my horse(s) serves is:	Other, please list::The primary purpose my horse(s) serves is:	Horses are livestock:Indicate how much you agree or disagree with the following statements:	Horses are companion animals and/or pets:Indicate how much you agree or disagree with the following statements:	Horses are friends, family, or children:Indicate how much you agree or disagree with the following statements:	Horses can experience pain:Indicate how much you agree or disagree with the following statements:	Horses can experience fear:Indicate how much you agree or disagree with the following statements:	Horses can experience boredom:Indicate how much you agree or disagree with the following statements:	Horses can experience frustration:Indicate how much you agree or disagree with the following statements:	Horses can experience depression:Indicate how much you agree or disagree with the following statements:	Horses can experience sadness:Indicate how much you agree or disagree with the following statements:	Horses can experience jealousy:Indicate how much you agree or disagree with the following statements:	Horses can experience anger:Indicate how much you agree or disagree with the following statements:	Horses can experience happiness:Indicate how much you agree or disagree with the following statements:	Horses can experience love:Indicate how much you agree or disagree with the following statements:	Do you believe there are horse welfare issues in the Canadian horse industry?	Horses at riding barns or stables:Which horses are at risk for welfare issues (check all that apply)?	Horses at breeding facilities:Which horses are at risk for welfare issues (check all that apply)?	Horses at rescue facilities or sanctuaries:Which horses are at risk for welfare issues (check all that apply)?	Competition or performance horses:Which horses are at risk for welfare issues (check all that apply)?	Horses on farms or acreages:Which horses are at risk for welfare issues (check all that apply)?	Horses at auctions or feedlots:Which horses are at risk for welfare issues (check all that apply)?	Any or All	Horses with ignorant owners	Slaughter	Unwanted horses and what to do with them:Indicate how much you agree or disagree about whether the following are horse welfare issues:	Horses that are not trained appropriately:Indicate how much you agree or disagree about whether the following are horse welfare issues:	Inappropriate or lack of horse knowledge by owners or caregivers:Indicate how much you agree or disagree about whether the following are horse welfare issues:	Financial costs of horse care:Indicate how much you agree or disagree about whether the following are horse welfare issues:	Horse slaughter:Indicate how much you agree or disagree about whether the following are horse welfare issues:	Not having the option of horse slaughter:Indicate how much you agree or disagree about whether the following are horse welfare issues:	Ineffective or lack of horse welfare laws:Indicate how much you agree or disagree about whether the following are horse welfare issues:	Ineffective or lack of enforcement capacity to protect horse welfare:Indicate how much you agree or disagree about whether the following are horse welfare issues:	Lack of financial resources by horse owners:Rank the following potential causes for reduced horse welfare, in terms of frequency:	Pride or unwillingness to reach out for help:Rank the following potential causes for reduced horse welfare, in terms of frequency:	Ignorance or lack of knowledge about welfare issues:Rank the following potential causes for reduced horse welfare, in terms of frequency:	Traditional practice in horse industry or unwillingness to embrace new methods:Rank the following potential causes for reduced horse welfare, in terms of frequency:	Malice or intention to hurt horses:Rank the following potential causes for reduced horse welfare, in terms of frequency:	Greed or profit driven:Rank the following potential causes for reduced horse welfare, in terms of frequency:	Lack of time by horse owner or staff:Rank the following potential causes for reduced horse welfare, in terms of frequency:	Education programs about standards of horse care:Rank the following strategies for improving horse welfare, in terms of effectiveness:	Stricter regulations and enforcement by horse organizations:Rank the following strategies for improving horse welfare, in terms of effectiveness:	Stricter regulations and enforcement by governmental organizations:Rank the following strategies for improving horse welfare, in terms of effectiveness:	Welfare certification programs for horse facilities:Rank the following strategies for improving horse welfare, in terms of effectiveness:	Low stress and humane handling training for horse professionals:Rank the following strategies for improving horse welfare, in terms of effectiveness:	Governmental organizations (eg. National Farm Animal Care Council, etc.):Who should deliver educational programs about horse care (check all that apply)?	Horse organizations (eg. Equine Canada, etc.):Who should deliver educational programs about horse care (check all that apply)?	Horse researchers:Who should deliver educational programs about horse care (check all that apply)?	Veterinarians:Who should deliver educational programs about horse care (check all that apply)?
16			4	1	1	0	0	0	0	0	0	0	0	0	2	1	1	1	1	1	1	1	0	0	0	0	0	0	0	0	0	0	0	6	5	2	4	7	3	1	2	4	5	3	1	0	1	1	1
18	Pleasure or trail riding		2	0	0	0	0	0	0	0	0	0	0	0	0	1	1	1	1	1	1	1	0	0	0	1	2	0	2	4	0	0	0	2	5	1	6	7	3	4	3	5	2	4	1	1	1	0	0
20																	0	0	0	0	0	0	0	0	0																					0	0	0	0
21	Riding or school lessons		0	2	4	0	0	0	0	0	4	4	0	0	0	1	0	0	0	1	0	1	0	0	0	1	2	1	1	2	1	0	0	7	4	3	1	5	2	6	5	1	2	4	3	0	1	0	1
22	Riding or school lessons		1	1	2	0	0	0	0	0	0	0	0	0	0	1	1	1	1	1	1	1	0	0	0	2	2	0	2	0	3	0	0	2	5	7	3	1	4	6	5	4	1	3	2	1	1	1	1
23	Breeding		1	1	3	0	0	0	0	0	0	0		0	2	1	1	1	1	1	1	1	0	0	0	0	1	0	0	3	0	0	0	4	5	1	7	2	3	6	1	4	3	2	5	0	1	1	1
24	Non-racing competition		0	1	3	0	0	0	0	1	2	1	0	0	3	1	0	0	0	1	0	1	0	0	0	2	3	0	2	4	0	1	1	3	2	1	5	7	4	6	1	5	4	3	2	0	1	1	1
25			0	0	1	0	0	0	0	0	2	2	1	1	3	1	1	1	1	1	1	1	0	0	0	0	0	0	1	2	0	1	1	5	6	1	3	7	4	2	1	4	5	3	2	1	1	1	1
26	Non-racing competition		1	1	2	0	0	0	0	0	0	0	0	0	0	1	1	1	1	1	1	1	0	0	0	4	1	0	1	3	0	1	1	2	4	1	5	7	6	3	2	4	5	1	3	1	1	1	1
27	Riding or school lessons		2	1	4	0	0	0	0	3	3	3	1	3	3	1	0	0	0	1	1	1	0	0	0	0	1	1	2	1	0	1	0													1	1	1	1
29	Pleasure or trail riding		1	1	3	1	1	1	1	1	1	1	1	1	2		0	0	0	0	0	0	0	0	0																					0	0	0	0
30	Non-racing competition		0	1	1	0	0	0	1	0	2	2	2	2	2	1	0	0	0	0	0	0	1	0	0	1	1	0	0	4	0	1	1	2	3	1	6	7	4	5	1	2	3	4	5	1	1	1	1
31	Companionship (eg. Retired horse, etc.)		0	0	0	0	0	0	0	1	0	1	1	1	1	1	1	1	1	1	1	1	0	0	0	0	1	0	1	1	1	1	1													1	1	1	1
32	Non-racing competition		1	1	3	0	0	0	0	0	0	3	3	1	4	1	1	1	1	0	0	1	0	0	0	1	3	1	3	3	1	1	1	1	4	2	3	7	6	5	3	5	1	2	4	1	1	1	1
33	Riding or school lessons		1	0	0	0	0	0	0	0	0	0	0	0	0	1	1	1	1	1	1	1	0	0	0	1	1	0	0	1	3	0	0													1	1	0	1
34	Riding or school lessons		0	1	3	0	0	0	0	0	0	0	0	0	0	1	0	1	0	1	1	1	0	0	0	0	1	0	1	2	1	2	2	7	6	1	2	3	4	5	2	4	5	1	3	1	1	1	1
36	Non-racing competition		4	1	0	0	0	0	0	0	0	0	0	0	0	1	0	0	0	0	1	1	0	0	0	0	1	0	1	2	1	1	0	3	2	4	5	1	6	7						0	1	0	0
37			1	1	2	0	0	0	0	1	1	1	1	1	2	1	1	1	1	1	1	1	0	0	0	0	1	0	1	0	0	1	0	4	5	1	2	7	6	3	1	5	4	3	2	1	0	0	1
38																	0	0	0	0	0	0	0	0	0																					0	0	0	0
41	Companionship (eg. Retired horse, etc.)		3	1	1	0	0	0	0	0	0	0	0	0	0		0	0	0	0	0	0	0	0	0																					0	0	0	0
42																	0	0	0	0	0	0	0	0	0																					0	0	0	0
43																	0	0	0	0	0	0	0	0	0																					0	0	0	0
44																	0	0	0	0	0	0	0	0	0																					0	0	0	0
45	Non-racing competition		3	1	1	0	0	0	0	0	0	1	0	0	0	1	1	1	1	1	1	1	0	0	0	1	1	3	3	1	1	0	0	2	4	1	3	7	6	5	1	4	5	2	3	1	1	1	1
46	Non-racing competition		1	2	4	1	1	1	1	1	1	1	1	1	2	1	1	0	1	1	0	1	0	0	0	1	1	1	3	1	3	1	3	3	5	1	2	7	4	6	4	2	1	5	3	1	1	0	0
47			1	1	2	0	0	1	2	3	3	4	2	2	2	1	1	1	1	1	1	1	1	0	0	2	3	1	1	1	2	0	2	4	7	1	6	2	3	5	1	5	4	2	3	1	1	1	1
48	Non-racing competition		0	0	0	0	0	0	0	0	0	0	0	0	0	1	1	1	1	1	1	1	0	0	0	1	3	0	0	4	2	1	0	3	4	1	7	5	6	2	3	1	2	4	5	0	1	0	0
49	Non-racing competition		2	1	2	0	1	3	3	1	3	4	4	2	3		0	0	0	0	0	0	0	0	0																					0	0	0	0
50	Non-racing competition		1	0		0	0	0	0	4	4	4	4	4	4	1	1	0	1	1	0	1	0	0	0	0	0	0	1	1	1	1	3	4	3	1	2	7	6	5	1	4	5	3	2	1	1	1	1
51	Other, please list:	Breed shows	2	2	2	0	0	0	0	0	1	1	0	1	2		0	0	0	0	0	0	0	0	0																					0	0	0	0
52	Pleasure or trail riding		1	1	1	0	0	0	0	0	0	2	0	0	2	1	0	0	0	1	0	1	0	0	0	1	2	2	3	0	4	0	0	4	3	2	1	7	6	5	1	5	2	3	4	1	1	1	1
53																	0	0	0	0	0	0	0	0	0																					0	0	0	0
54	Pleasure or trail riding																0	0	0	0	0	0	0	0	0																					0	0	0	0
56	Riding or school lessons		1	0	0	0	0	0	0	0	0	0	0	0	0	1	1	1	1	1	1	1	0	0	0	1	1	1	1	1	1	1	1	3	5	1	2	7	6	4	2	4	5	1	3	1	1	1	1
57	Companionship (eg. Retired horse, etc.)		2	0	0	0	0	0	0	0	0	0	0	0	0	1	1	1	1	1	1	1	1	0	0	0	2	1	2	0		0	0	2	6	3	5	7	1	4	4	3	1	2	5	1	1	0	1
58	Pleasure or trail riding		3	0	0	0	0	0	0	0	0	0	0	0	0	1	1	1	0	1	0	1	0	0	0	0	3	1	1	0	2	2	2													1	1	1	1
59	Pleasure or trail riding																0	0	0	0	0	0	0	0	0																					0	0	0	0
60	Non-racing competition			0	0	0	0	0	0	0	0	0	0	0	0	1	1	1	0	1	0	1	0	0	0	0	0	0	0	0	0	0	0													1	1	0	1
61			4	0	0	0	0	0	0	0	0	0	0	0	0	1	1	1	0	1	1	1	0	0	0	0	0	0	2	0	4	0	0	5	4	2	7	6	1	3	4	3	2	1	5	0	1	0	1
63	Pleasure or trail riding		1	1	1	0	0	1	2	2	1	3	0	1	3	1	1	1	1	1	1	1	0	0	0	0	1	0	1	0	0	1	0	3	4	1	2	7	5	6	3	2	1	4	5	1	1	0	1
64			0	2	4	0	0	1	2	1	3	2	2	2	3	1	1	1	1	1	1	1	0	0	0	0	2	2	2	3	0	0	0	4	2	3	1	7	5	6	3	5	4	1	2	1	1	1	1
65	Non-racing competition		2	0	0	0	0	0	0	0	0	0	0	0	0	1	1	0	0	1	0	1	0	0	0	0	1	0	2	0	2	0	0													1	1	1	1
66			3	0	0	0	0	0	0	0	0	0	0	0	0	1	1	1	0	1	0	1	0	0	0	0	0	0	0	0	0	0	0	1	3	2	4	7	6	5	4	1	2	3	5	1	1	1	1
67	Pleasure or trail riding		2	0	1	0	0	0	0	1	1	2	1	1	2	1	1	1	1	1	1	1	0	0	0	0	1	1	1	0	0	1	0	3	6	5	2	7	4	1	3	4	5	1	2	0	1	0	1
68			3	0	0	0	0	0	0	0	0	0	0	0	0	1	0	0	0	0	1	1	0	0	0	1	2	1	1	0	1	0	0	1	2	3	5	7	6	4	1	2	5	3	4	1	1	1	0
69																	0	0	0	0	0	0	0	0	0																					0	0	0	0
70	Other, please list:	Draft horses pulling primarily wagons of guests, some field work This might be grouped into work horses. I'm not sure	0	0	0	0	0	0	0	1	2	2	2	2	2	1	1	1	1	1	1	1	0	0	0	1	1	0	0	2	0	1	1	2	3	1	6	4	5	7	1	2	4	3	5	1	1	1	1
71	Non-racing competition		0	0	0	0	0	0	0	0	0	0	0	0	2	1	1	1	0	1	0	1	0	0	0	3	1	0	2	0	0	0	0	5	4	2	3	7	1	6	1	3	4	2	5	1	1	1	1
72	Pleasure or trail riding		3	3	3	1	0	0	1	1	2	2	2	1	1	1	0	1	1	0	0	1	0	0	0																					0	0	0	0
73	Riding or school lessons		1	1	1	0	0	0	0	0	0	0	0	0	1	1	0	1	0	1	0	1	0	0	0	0	1	1	1	2	1	1	1													1	1	0	1
74	Other, please list:	Two mares are Friesians and are used in weddings. Plus we trail ride.	3	0	2	0	0	0	0	0	0	0	0	2	4	1	1	1	1	1	1	1	0	0	0	0	0	0	2	2	0	0	0	2	4	1	3	7	6	5	1	2	4	3	5	0	0	1	1
75	Riding or school lessons		1	1	2	0	0	0	0	0	2	2	2	2	2	1	1	1	1	1	1	1	0	0	0	0	0	1	3	2	0	0	0	6	5	2	3	1	4	7	2	4	5	1	3	1	1	1	1
76			1	0	1	0	0	0	0	0	0	1	1	0	1	1	1	0	0	1	0	1	0	0	0	1	1	0	0	2	2	0	0	4	7	5	6	1	2	3	3	4	5	1	2	0	1	1	0
78	Pleasure or trail riding		1	1	1	0	0	0	0	2	1	0	0	0	2	1	1	1	1	1	1	1	0	0	0	0	2	1	2	3	0	3	3	6	3	2	1	7	4	5	2	4	5	1	3	1	1	1	1
79	Breeding		0	0	0	0	0	0	0	0	0	0	0	0	0	1	1	1	0	1	1	1	0	0	0	0	0	0	0	0	0	0	0	2	7	3	4	5	1	6	3	2	4	1	5	1	1	1	1
80			0	0	2	0	0	1	1	0	1	2	1	0	2	1	0	0	1	0	0	1	0	0	0	1	2	1	2	0	0	0	0	1	5	2	4	3	6	7	1	4	3	2	5	1	1	1	1
81			3	1	1	0	0	0	0	0	0	0	0	0	0	1	1	1	1	1	1	1	0	0	0	0	0	0	0	0	0	0	0	2	6	1	4	7	3	5	2	4	5	1	3	1	1	0	1
82	Pleasure or trail riding		0	0		0	0	0	0	0			0	0	0	1	1	1	0	1	0	1	0	0	0	0	1	0	0	0	0	0	0													1	1	0	0
84			1	1	2	0	0	0	0	0	0	2	0	0	2		0	0	0	0	0	0	0	0	0																					0	0	0	0
86	Pleasure or trail riding		0	0	0	0	0	0	0	0	0	2	0	0	2	1	1	1	1	1	1	1	1	0	0	0	0	0	1	0	0	0	0	3	4	1	2	7	5	6	1	3	2	4	5	1	1	1	1
88	Horse therapy or rehabilitation		0	0	0	0	0	0	0	0	0	0	0	0	0		0	0	0	0	0	0	0	0	0																					0	0	0	0
90	Non-racing competition		3	0	0	0	0	0	0	0	0	0	0	0	0		0	0	0	0	0	0	0	0	0																					0	0	0	0
91	Other, please list:	A mix of multiple; a broodmare, a pleasure/companion horse and a competition horse.	1	0	0	0	0	0	1	1	1	1	2	1	1	1	1	1	0	0	0	1	0	0	0	0	2	0	0	0	0	0	0	3	4	2	5	1	7	6	1	3	2	5	4	1	1	0	1
92			2	1	1	0	0	0	0	0	0	1	0	0	1	1	0	1	1	1	0	1	0	0	0	0	0	1	1	2	2	0	0	3	6	4	5	2	1	7	4	3	1	2	5	1	1	1	1
93	Riding or school lessons		1	1	4	1	1	1	1	1	1	1	1	1	1	1	1	1	1	1	1	1	0	0	0	0	0	0	1	0	4	0	0	2	3	1	4	6	5	7	1	3	2	4	5	1	1	0	0
94	Other, please list:	Hunter, jumper and dressage competition	2	1	1	0	0	0	0	1	1	1	1	1	1	1	1	1	1	1	0	1	0	0	0	1	3	1	3	0	4	2		2	7	1	3	4	6	5	2	5	1	3	4	1	1	0	1
95	Non-racing competition		1	1	1	0	0	0	0	0	0	0	0	0	0	1	1	1	1	1	1	1	0	0	0	1	0	0	1	1	1	1	0	2	3	1	6	7	5	4	3	2	1	4	5	0	1	1	1
96	Breeding		0	0		0	0	0	0	0	0	0	0	0			0	0	0	0	0	0	0	0	0																					0	0	0	0
98	Non-racing competition		3	1	1	0	0	0	0	1	1	3	3	0	1	1	0	0	0	1	0	1	0	0	0	1	1	1		2	2	1	1	3	5	1	2	7	4	6	2	4	5	3	1	1	1	1	1
99			0	0	3	0	0	0	2	2	1	3	2	2	2	1	1	1	1	1	1	1	0	0	0	1	1	1	1	1	0	1	1	4	2	1	3	7	5	6	2	5	4	3	1	1	1	1	0
100	Non-racing competition																0	0	0	0	0	0	0	0	0																					0	0	0	0
101	Work (eg. Ranching, logging, outfitting, etc.)																0	0	0	0	0	0	0	0	0																					0	0	0	0
102	Non-racing competition		1	1	1	0	0	0	0	0	0	0	1	0	0	1	1	1	1	1	1	1	1	0	0	0	0	0	0	0	1	0	0	6	3	1	7	5	2	4	1	3	4	5	2	0	1	1	1
103	Pleasure or trail riding		3	1	3	0	0	0	0	2	0	2	0	0	2	1	0	0	1	1	0	1	0	0	0	1	3	3	3	1	2	1	1	5	3	2	1	7	4	6	3	2	1	5	4	1	1	1	1
104	Other, please list:	barrel racing training	1	1	2	0	0	1	1	1	1	1	1	1	2		0	0	0	0	0	0	0	0	0																					0	0	0	0
105	Non-racing competition		1	1	2	0	0	0	0	0	3	3	3	2	2	1	1	1	1	1	1	1	0	0	0	1	1	1	3	3	1	1	1	4	7	1	6	2	3	5	1	2	3	5	4	1	1	1	1
106			4	0	0	0	0	0	0	0	0	0	0	0	0		0	0	0	0	0	0	0	0	0																					0	0	0	0
107	Other, please list:	train in dressage, trail, and pleasure riding learning multiple disciplines	2	0	2	0	0	0	0	0	0	0	0	2	2	1	1	1	1	1	1	1	0	0	0	1	1	0	0	0	0	0	0	2	4	1	5	7	3	6	3	2	1	4	5	1	1	0	1
108			4	0	0	0	0	0	0	0	0	0	0	0	0	1	0	1	0	1	0	1	0	0	0	0	0	0	0	0	0	0	0	4	5	1	2	7	3	6	5	2	1	3	4	1	1	1	1
110	Riding or school lessons																0	0	0	0	0	0	0	0	0																					0	0	0	0
111																	0	0	0	0	0	0	0	0	0																					0	0	0	0
112	Non-racing competition		1	2	2	0	0	0	0	0	1	1	0	0	2	1	1	0	0	0	0	1	0	0	0	0	2	1	1	1	2	1	1	3	2	1	6	5	7	4	1	2	5	3	4	1	1	0	1
113			1	3	3	0	0	0	0	1	1	1	1	1	1	1	0	0	0	0	0	0	0	0	0									2	1	4	5	6	7	3	1	3	4	5	2	1	1	1	1
114	Pleasure or trail riding		1	1	1	0	0	1	1	2	2	2	3	2	3		0	0	0	0	0	0	0	0	0																					0	0	0	0
115	Pleasure or trail riding		1	0	1	1	1	1	1	1	1	1	1	1	1	0	0	0	0	0	0	0	0	0	0																					0	1	0	1
116			2	1	1	0	0	0	0	0	0	0	0	0	1	1	1	1	0	1	0	1	0	0	0	1	2	1	2	0	3	2	0													0	1	0	1
118	Pleasure or trail riding		2	0	0	0	0	0	0	0	0	0	0	0	0		0	0	0	0	0	0	0	0	0																					0	0	0	0
119	Non-racing competition		2	1	2	0	0	0	1	1	2	2	2	2	1	1	1	1	1	1	1	1	0	0	0	0	0	1	1	3	1	0	0	3	2	1	4	6	5	7	1	2	3	4	5	0	1	0	1
120			1	2	3	0	0	0	0	0	0	0	0	0	0	1	1	1	1	1	1	1	0	1	0	4	0	0	1	4	0	1	1	1	7	2	6	5	4	3	4	3	1	2	5	1	1	1	1
121	Pleasure or trail riding		0	0	0	0	0	0	0	0	0	0	0	0	0		0	0	0	0	0	0	0	0	0																					0	0	0	0
122																	0	0	0	0	0	0	0	0	0																					0	0	0	0
123	Racing competition		0	0	3	0	0	0	0	0	0	0	0	0	0	1	1	1	1	1	1	1	0	0	0	0	2	1	2	2	0	1	1	5	3	1	2	7	6	4	1	3	2	4	5	1	1	1	1
125	Riding or school lessons		2	2	1	0	0	0	0	0	0	0	0	0	0	1	1	1	1	1	1	1	0	0	0	1	2	2	2	1	1	1	1	3	5	1	7	2	6	4	1	4	5	3	2	1	1	1	1
126	Pleasure or trail riding		2	0	0	0	0	0	0	0	1	1	1	0	0	1	1	1	1	1	1	1	0	0	0	0	0	0	0	1	1	0	0	4	7	3	1	5	2	6	4	3	2	5	1	0	1	1	1
128			1	1	2	0	0	0	0	0	1	2	1	1	2	1	1	1	0	1	1	1	0	0	0	0	1	0	1	3	0	0	0				1									0	1	0	1
129	Pleasure or trail riding		0	1	1	0	0	0	0	0	0	0	0	0	0	1	1	1	1	1	1	1	0	0	0	0	1	0	0	0	0	0	0	4	3	1	5	7	2	6	3	2	1	4	5	1	1	1	1
130	Non-racing competition		3	0	0	0	0	0	0	0	0	0	0	0	0	1	0	0	0	1	0	1	0	0	0	0	2	0	0	0	4	0	0	2	6	1	5	7	4	3	1	3	2	4	5	0	0	1	1
131	Pleasure or trail riding		1	0	1	0	0	0	0	0	0	0	0	0	0	1	1	1	1	1	1	1	0	0	0	0	1	1	1	0	0	1	1	2	3	6	5	4	1	7	1	2	5	4	3	1	1	1	1
132	Non-racing competition																0	0	0	0	0	0	0	0	0																					0	0	0	0
133			3	1	1	0	0	0	0	0	0	2	2	0	0	1	1	1	0	1	1	1	0	0	0	1	2	1	1	0	3	1	0	2	5	1	4	6	3	7	5	2	1	4	3	1	1	0	0
134	Work (eg. Ranching, logging, outfitting, etc.)		1	1	2	0	0	0	0	1	1	1	0	0	2	0	0	0	0	0	0	0	0	0	0																					1	1	1	1
135			2	1	1	0	0	0	1	0	1	1	0	0	0	0	0	0	0	0	0	0	0	0	0																					0	1	1	1
136	Non-racing competition		4	0	0	0	0	0	0	0	0	0	0	0	1	1	1	1	1	1	1	1	0	0	0	1	0	0	1	2	2	1	0	6	4	1	5	3	2	7	1	3	5	2	4	0	1	0	0
137	Other, please list:	Sales	1	1	3	0	0	0	0	0	0	1	3	0	1	1	1	1	1	1	1	1	0	0	0	0	0	0	2	2	1	0	0	5	4	1	2	7	6	3	3	5	4	2	1	1	1	1	1
139	Pleasure or trail riding		3	1	2	0	0	1	1	1	1	3	1	1	1	1	1	1	1	1	1	1	0	0	0	0	1	0	2	1	2	0	0	1	5	2	3	7	6	4	5	2	1	3	4	1	1	1	1
140	Companionship (eg. Retired horse, etc.)		3	0	1	0	0	0	0	0	0	0	0	0	0	1	1	1	0	1	1	1	0	0	0	0	1	1		0	2	2	1													1	1	1	1
143	Riding or school lessons		2	0	0	0	0	0	0	0	0	0	0	0	0	1	1	1	0	0	0	1	0	0	0	1	1	0	0	0	2	1	0	6	3	2	7	4	1	5	1	5	3	2	4	1	1	1	1
145	Non-racing competition		1	1	0	0	0	0	0	1	1	1	0	0	0	1	0	1	0	0	1	1	0	0	0	3	1	0	0	0	4	1	0	4	3	1	6	2	5	7	4	2	1	3	5	1	1	0	0
147	Pleasure or trail riding																0	0	0	0	0	0	0	0	0																					0	0	0	0
148	Pleasure or trail riding		4	0	0	0	0	1	1	1	1	1	1	1	1	1	0	1	0	1	1	1	0	0	0	0	0	0	1	0	2	1	0	3	6	4	5	7	1	2	3	2	1	4	5	0	1	1	1
150	Pleasure or trail riding		4	0	0	0	0	0	0	0	0	0	0	0	0	1	1	1	1	1	1	1	0	0	0	0	0	0	1	0	0	1	1	5	6	3	2	7	1	4	2	3	5	1	4	1	1	1	1
153	Companionship (eg. Retired horse, etc.)		1	1	1	0	0	0	0	0	0	2	2	0	0	1	0	0	0	0	0	1	0	1	0	1	2	1	1	2	1	0	0	4	3	2	1	7	5	6	1	4	5	3	2	1	1	1	1
154																	0	0	0	0	0	0	0	0	0																					0	0	0	0
155	Pleasure or trail riding		3	2	2	0	0	0	0	0	1	0	0	0	1	1	0	1	0	0	0	1	0	0	0	0	2	1	1	2	1	0	0	3	2	1	4	6	7	5	4	2	1	5	3	1	1	1	1
156	Other, please list:	Carriage drivinh	3	0	1	0	0	0	0	0	0	1	1	0	0	1	1	1	0	1	1	1	0	0	0	1	1	1	1	1	2	1	1	3	6	5	1	7	2	4	1	4	5	3	2	1	1	1	1
157																	0	0	0	0	0	0	0	0	0																					0	0	0	0
158	Riding or school lessons		1	0	1	0	0	0	0	0	0	0	0	0	0	1	1	1	1	1	1	1	0	0	0	0	0	0	0	0	0	0	0	2	3	1	4	7	6	5	1	4	3	5	2	1	1	1	1
159	Non-racing competition		1	1	1	0	0	1	1	1	1	1	1	1	1	1	0	0	0	0	0	0	1	0	0	0	1	0	0	1	0	1	1	2	6	1	5	7	3	4	1	3	2	4	5	1	1	0	1
160	Companionship (eg. Retired horse, etc.)		1	1	1	0	0	1	1	1	1	1	1	1	1	1	1	1	1	1	1	1	0	0	0	0	0	0	1	0	4	1	4	1	3	6	4	7	2	5	1	4	5	3	2	1	1	1	1
161	Pleasure or trail riding																0	0	0	0	0	0	0	0	0																					0	0	0	0
163																	0	0	0	0	0	0	0	0	0																					0	0	0	0
164	Other, please list:	Equal between retired & riding/lessons	4	0	0	0	0	0	0	0	0	0	2	0	0	1	0	0	0	0	0	0	1	0	0	0	1	0	1	1	1	0	0	4	6	3	5	7	1	2	1	2	4	3	5	1	1	1	1
165	Breeding		3	1	2	0	0	0	0	0	0	0	0	0	0	1	1	1	1	1	1	1	0	0	0	1	1	1	1	1	1	1	1	4	3	6	1	7	2	5	1	2	5	4	3	1	1	1	1
166	Pleasure or trail riding		0	0	1	0	0	0	0	0	0	1	1	0	2	1	1	1	1	1	1	1	0	0	0	1	1	1	2	2	2	2	1	5	6	1	3	7	4	2	1	3	5	4	2	1	1	1	1
167	Pleasure or trail riding		4	0	0	0	0	0	0	0	0	0	0	0	0	1	1	1	1	1	1	1	0	0	0	0	0	0	0	0	0	0	0	2	7	1	4	6	5	3	1	5	4	3	2	1	1	1	1
168	Riding or school lessons		2	1	0	0	0	0	0	0	1	1	1	1	2	0	0	0	0	0	0	0	0	0	0																					0	1	1	1
170	Other, please list:	I own three: One retired, one lesson horse, and two competition horses. Lease one for lessons as well.	1	3	3	0	0	0	0	2	2	2	1	1	2		0	0	0	0	0	0	0	0	0																					0	0	0	0
171	Non-racing competition		1	2	3	0	0	0	0	0	0	0	0	0	0	1	1	1	1	1	1	1	1	0	0	1	0	0	2	2	2	0	0	3	6	5	1	7	4	2	2	4	3	1	5	1	1	1	1
173	Non-racing competition		1	1	2	0	0	1	1	1	1	1	1	1	1		0	0	0	0	0	0	0	0	0																					0	0	0	0
174	Non-racing competition		1	1	4	0	0	0	0	0	2	2	0	1	1	1	0	0	0	0	1	1	0	0	0	0	1	1	1	1	0	3	3	2	4	1	5	7	6	3	1	4	5	3	2	0	1	0	1
175	Pleasure or trail riding		0	1	1	0	0	0	0	0	0	0	0	1	1	1	1	1	1	1	1	1	0	0	0	0	0	0	1	2	1	1	0	3	6	1	7	4	2	5	1	4	3	2	5	1	1	1	1
176																	0	0	0	0	0	0	0	0	0																					0	0	0	0
178	Companionship (eg. Retired horse, etc.)		0	0	1	0	0	0	0	0	0	0	0	0	0	1	0	0	1	0	1	1	0	0	0	0	2	1	1	1	0	1	1	1	3	2	6	7	4	5	1	4	5	2	3	1	1	1	1
179	Companionship (eg. Retired horse, etc.)		0	1	1	0	0	2	1	2	2	1	1	1	2		0	0	0	0	0	0	0	0	0																					1	1	1	1
180	Pleasure or trail riding		1	1	1	1	1	1	1	1	0	0	0	1	0		0	0	0	0	0	0	0	0	0																					0	0	0	0
181			1	0	0	0	0	0	0	0	0	2	1	0	3	1	1	1	1	1	1	1	0	0	0	0	1	1	1	3	1	1	1	2	3	6	1	7	4	5	5	1	2	3	4	1	1	0	1
182	Breeding		0	0	1	0	0	0	0	0	0	0	0	0	0	1	1	1	0	0	1	0	0	0	0	1	1	1	1	4	0	0	0	4	5	2	6	1	3	7	1	3	5	4	2	1	1	1	1
183	Breeding		3	1	1	0	0	0	0	0	0	0	0	1	2	1	0	0	0	1	0	1	0	0	0	0	0	0	0	2	0	0	0	7	5	3	4	1	2	6	4	2	1	5	3	0	1	0	0
185	Non-racing competition		1	1	1	1	1	1	1	1	1	2	1	1	1	1	1	1	0	1	0	1	0	0	0	0	0	0	1	2	0	1	1	5	3	4	2	6	1	7	3	2	4	1	5	1	1	1	1
187			0	0	4	0	0	0	0	0	0	0	0	0	0	1	1	1	1	1	1	1	0	0	0	0	0	0	0	0	1	0	0	4	5	1	2	7	6	3	4	2	1	3	5	1	1	1	1
188	Pleasure or trail riding		4	0		0	0	0	0	0	0	0	0	0	0	1	1	1	0	1	0	1	0	0	0	0	0	2	2	0	4	0	0	4	5	2	3	7	1	6	1	4	5	2	3	1	1	1	1
191	Non-racing competition		1	0	0	0	0	0	0	0	0	0	0	0	2	1	0	0	1	0	1	1	0	0	0	0	1	0	0	1	0	0	0	7	2	1	4	6	3	5	1	2	3	5	4	1	1	0	1
195	Non-racing competition		1	2	1	1	2	1	1	1	1	1	1	1	2	0	0	0	0	0	0	0	0	0	0																					1	1	1	1
196																	0	0	0	0	0	0	0	0	0																					0	0	0	0
197	Pleasure or trail riding		2	1	1	0	0	0	0	0	0	0	0	0	0	1	0	0	0	0	0	0	1	0	0	2	1	1	2	1	3	1	1	2	6	1	7	5	3	4	1	4	5	2	3	1	1	0	1
198	Pleasure or trail riding																0	0	0	0	0	0	0	0	0																					0	0	0	0
199																	0	0	0	0	0	0	0	0	0																					0	0	0	0
200	Pleasure or trail riding		3	1	1	0	0	0	0	0	0	0	0	0	1	1	0	1	0	0	0	1	0	0	0	1	2	1	2	1	2	2	2	7	4	5	6	1	2	3	1	4	5	2	3	0	1	0	0
201			0	1	3	0	0	0	0	0	1	1	1	1	2		0	0	0	0	0	0	0	0	0																					0	0	0	0
203	Non-racing competition		1	0	2	0	0	0	0	0	0	0	1	1	1	1	1	1	1	1	1	1	0	0	0	0	1	0	0	1	1	0	0	1	6	2	3	5	4	7	1	5	3	2	4	1	1	1	1
204	Pleasure or trail riding		0	1	1	0	0	0	0	0	0	1	0	0	1	1	1	1	1	1	1	1	0	0	0	2	1	0	1	2	3	1	1	4	3	1	6	5	2	7	1	5	3	2	4	1	1	0	0
207	Pleasure or trail riding		1	1	1	0	0	0	0	0	0	1	0	0	1	1	1	1	1	1	1	1	0	0	0	0	1	0	1	2	2	1	1	1	4	5	2	7	6	3	1	5	4	2	3	1	1	0	1
208	Riding or school lessons																0	0	0	0	0	0	0	0	0																					0	0	0	0
209	Pleasure or trail riding		1	0	0	0	0	0	0	0	0	2	0	0	2	1	1	1	1	1	1	1	0	0	0	0	0	0	0	0	2	0	0	4	5	6	3	1	2	7	4	5	3	2	1	1	1	1	1
210	Pleasure or trail riding		1	1	1	0	0	0	0	0	0	0	0	0	0	1	0	0	0	0	0	1	0	0	0	1	1	1	1	0	4	0	0	4	2	1	7	5	3	6	1	3	2	5	4	1	1	0	0
211			1	0	0	0	0	0	0	0	0	0	0	0	0	1	1	1	0	1	0	1	0	0	0	0	0	1	2	1	1	0	1	5	4	6	3	1	2	7	3	4	1	5	2	1	1	0	1
212																	0	0	0	0	0	0	0	0	0																					0	0	0	0
213	Other, please list:	With 11 of my own horses, there are several different purposes for these horses. My stallion and brood mares are for breeding. My lesson horses are for...lessons and I compete with two and use another for pleasure. The young stock 1-3years are in training and for sale.	1	1	4	0	0	0	0	0	0	0	0	0	1	1	0	0	1	1	0	1	0	0	0	0	0	0	0	0	0	0	0	4	5	1	2	7	6	3	1	4	5	2	3	1	1	0	1
214	Companionship (eg. Retired horse, etc.)		1	1	2	0	0	0	0	1	1	2	2	1	2	1	1	1	1	1	1	1	1	0	0																					0	0	0	0
215	Pleasure or trail riding		0	0	0	0	0	0	0	0	0	0	0	0	0	1	1	1	1	1	1	1	0	0	0	0	1	0	0	2	1	2	1	4	2	5	1	7	6	3	2	4	5	3	1	0	1	0	1
216	Other, please list:	Showing	0	0	1	0	0	0	0	2	2	0	0	0	1	0	0	0	0	0	0	0	0	0	0																					1	1	1	1
218	Riding or school lessons		0	0	0	0	0	0	0	0	0	0	0	0	0	1	0	0	0	0	0	1	0	0	0	3	3	0	2	2	0	4	4	4	6	1	7	2	3	5	1					0	0	0	0
220			1	0	0	0	0	0	0	0	0	0	0	0	0	1	1	1	1	1	1	1	0	0	0	0	0	0	0	2	0	0	0	2	6	5	3	7	4	1	3	1	4	2	5	1	1	1	1
221	Pleasure or trail riding		1	0	0	0	0	0	1	1	2	3	0	0	0	1	0	1	0	1	0	0	0	0	0	1	1	1	2	3	1	1	1	2	6	5	3	7	1	4	5	1	4	3	2	0	1	1	1
222	Other, please list:	Pleasure and competition	0	0	0	0	0	0	0	0	0	0	0	0	0	1	0	0	0	0	0	0	0	1	0	0	0	0	0	3	1	0	0	3	2	1	4	7	6	5	1	3	2	4	5	0	0	0	0
223	Breeding		0	2	2	0	0	0	1	1	2	1	0	1	2	1	0	0	1	0	0	1	1	0	0	0	2	0	1	4	4	1	1	2	3	1	6	7	5	4	2	4	5	3	1	1	1	0	1
224	Pleasure or trail riding		3	0	1	0	0	0	2	1	1	0	0	0	1	1	0	0	0	0	0	1	0	0	0	1	1	1	1	1	2	1	1	3	5	1	2	7	6	4						0	1	0	1
227	Pleasure or trail riding		4	0	0	0	0	0	0	0	1	1	1	1	1	1	1	1	1	1	1	1	0	0	0	1	1	1	1	0	4	0	0	3	6	4	1	7	2	5	2	5	1	4	3	0	0	0	1
228	Pleasure or trail riding																0	0	0	0	0	0	0	0	0																					0	0	0	0
229	Pleasure or trail riding		2	1	0	0	0	0	0	1	1	1	1	1	1	1	1	1	0	1	0	1	0	0	0	0	2	0	0	0	3	0	0													1	1	0	1
230	Riding or school lessons		1	1	3	0	0	0	2	1	2	2	2	2	1	1	0	0	0	0	0	0	1	0	0	0	1	1	1	1	2	1	0	4	6	1	5	7	2	3	4	2	1	3	5	1	1	1	1
231	Companionship (eg. Retired horse, etc.)		2	0	0	0	0	0	0	0	0	2	0	0	0	1	0	0	0	0	0	1	0	1	0	0	2	0	1	1	2	1	1	2	4	1	6	7	5	3	1	4	3	2	5	1	1	1	1
232	Pleasure or trail riding		4	0	2	0	0	0	0	0	0	0	0	0	0		0	0	0	0	0	0	0	0	0																					0	0	0	0
233	Other, please list:	Combination of lessons, breeding, trail and showing. Retired and young here, too.	1	0	0	0	0	0	0	0	0	0	0	0	0	1	1	1	1	1	1	1	1	0	0	0	1	1	0	2	0	0	0	1	3	2	6	7	4	5	3	2	1	4	5	1	1	1	1
234	Work (eg. Ranching, logging, outfitting, etc.)		1	1	2	0	0	0	0	0	0	0	0	0	0	1	1	1	1	1	1	1	0	0	0	2	2	2	2	2	2	2	2	7	4	1	2	5	6	3	1	4	3	2	5	1	1	1	1
235			0	0	0	0	0	0	0	0	0	0	0	0	0	1	0	0	1	0	1	1	0	0	0	0	0	0	0	3	1	0	0	1	5	2	4	7	6	3	1	2	3	4	5	1	1	1	1
236	Pleasure or trail riding		1	1	1	0	0	0	0	0	0	1	2	1	1	1	0	0	0	1	0	1	0	0	0	0	0	0	1	3	0	0	0	3	4	1	2	6	5	7	4	2	1	5	3	1	1	0	1
237	Pleasure or trail riding		0	0	0	0	0	0	0	0	0	0	0	0	0	1	0	0	0	0	0	1	0	0	0	1	1	0	0	0	2	0	0	3	4	2	6	1	7	5	3	2	1	4	5	1	1	0	1
238	Riding or school lessons		4	0	0	0	0	0	0	0	0	0	0	0	0	1	1	1	1	1	1	1	0	0	0	1	1	0	2	0	3	1	1	3	2	1	5	7	6	4	3	2	1	4	5	1	1	1	1
241	Breeding		0	0	0	0	0	0	0	0	0	0	0	0	4	1	0	0	0	0	0	0	1	0	0	0	0	0	2	3	0	4	4	3	2	1	4	7	6	5	2	4	5	3	1	1	0	1	1
243	Breeding		1	0	4	0	0	0	0	0	2	2	1	1	1		0	0	0	0	0	0	0	0	0																					0	0	0	0
244	Pleasure or trail riding		1	0	0	0	0	0	0	0	0	0	0	0	2	1	0	0	0	0	0	0	1	0	0	0	0	0	1	0	1	0	0	3	5	1	4	6	2	7	1	4	3	2	5	0	1	0	1
246			0	1	4	0	0	1	1	4	4	4	1	1	4	1	0	0	1	1	1	0	0	0	0	2	1	0	2	4	0	3	3	2	4	1	3	7	6	5	1	5	3	2	4	1	1	1	0
250			1	0	0	0	0	0	0	0	0	0	0	0	0	1	1	1	1	1	1	1	0	0	0	0	0	0	0	0	0	0	0	3	6	2	5	7	1	4	2	3	4	5	1	1	1	0	0
251	Horse therapy or rehabilitation		2	1	1	0	0	0	0	0	0	0	0	0	0	1	1	1	1	1	1	1	0	0	0	0	0	0	1	0	3	0	0	3	5	6	7	4	1	2	1	4	3	2	5	1	1	1	1
252	Pleasure or trail riding		3	1	1	0	0	0	0	0	0	1	1	0	1	1	0	0	0	0	0	1	0	1	0	1	1	0	1	0	3	1	1	2	5	1	3	7	4	6	1	5	3	2	4	0	1	0	1
253	Non-racing competition		1	1	3	0	0	1	1	1	3	3	1	1	1	1	0	0	0	1	0	1	0	0	0	0	3	0	1	0	0	2	1	3	5	1	4	7	2	6	2	4	1	5	3	1	1	0	1
255	Pleasure or trail riding		2	0	0	0	0	0	0	0	1	1	1	1	1	1	1	1	0	1	0	1	0	0	0	0	2	3	2	0	3	0	0	2	3	1	6	5	7	4	1	3	2	5	4	1	1	1	1
256	Pleasure or trail riding		1	0	0	0	0	0	0	0	0	0	0	0	0	1	1	1	0	1	1	1	0	0	0	0	0	0	1	0	1	0	0	5	3	4	6	2	1	7	1	5	4	2	3	1	1	1	1
257	Pleasure or trail riding		2	1	1	0	0	0	0	0	0	0	0	0	0	1	1	1	1	1	1	1	0	0	0	1	0	0	0	1	1	0	0	3	4	1	2	7	5	6	2	4	5	1	3	0	1	1	1
258	Breeding		1	3	1	0	0	0	0	0	0	0	0	2	0	1	1	1	1	1	1	1	1	0	0	1	1	0	1	2	0	2	1	2	6	3	4	7	5	1	1	4	3	5	2	1	1	0	1
259	Other, please list:	Lessons, Trail and Pleasure	1	0	1	0	0	0	0	0	0	0	0	0	0	1	0	0	0	0	0	1	0	0	0	0	2	0	1	0	0	0	0	3	5	2	7	6	1	4	1	3	2	4	5	1	1	1	1
261	Pleasure or trail riding		4	1	1	0	0	0	0	0	0	0	0	0	1	1	1	1	1	1	1	1	0	0	0	1	1	0	0	0	4	0	0	3	5	4	1	7	2	6	1	3	2	4	5	1	1	1	1
263	Pleasure or trail riding		0	0	0	0	0	0	0	0	0	0	0	0	0	1	1	1	1	1	1	1	0	0	0	1	1	1	1	1	1	0	1	5	4	2	6	3	1	7	1	4	5	2	3	1	1	1	1
264	Pleasure or trail riding		1	3	3	0	0	0	1	1	2	1	2	1	2	1	0	0	0	0	0	1	0	1	0	0	1	1	1	1	1	2	2	1	4	2	3	7	6	5	1	4	5	2	3	1	1	1	1
266	Other, please list:	for others to enjoy,encourage others to visit for horse contact	2	0	2	0	0	0	0	0	0	0	2	1	2	1	1	1	0	1	1	1	0	0	0	0	0	0	0	0	1	0	0	3	4	2	1	7	5	6	4	2	1	5	3	1	1	1	0
270			1	0	0	0	0	0	0	0	2	1	1	2	2	1	1	1	1	1	1	1	0	0	0	0	2	0	3	2	1	0	1	6	5	1	4	7	3	2	1	4	5	2	3	0	1	1	1
271																	0	0	0	0	0	0	0	0	0																					0	0	0	0
275	Companionship (eg. Retired horse, etc.)		4	0	0	0	0	0	0	0	0	0	0	0	0	1	1	1	0	0	0	1	0	0	0	0	4	0	0	0	0	0	0	2	4	6	7	3	1	5	3	5	1	2	4	1	1	1	1
276			4	0	0	0	0	0	0	0	0	0	0	0	0	1	1	1	1	1	1	1	0	0	0	0	1	1	1	0	0	0	0	1	2	4	7	6	3	5	2	1	5	4	3	0	1	0	1
277			1	2	4	1	0	0	0	0	0	2	1	1	2	1	0	0	0	1	1	1	0	0	0	1	1	1	2	2	2	1	1	2	5	1	3	7	6	4	3	4	5	2	1	1	1	1	1
279			1	1	1	0	0	0	0	0	0	0	0	0	0	1	1	1	1	1	1	1	0	0	0	0	0	0	1	3	1	1	1	4	5	1	3	7	6	2	1	4	5	3	2	0	1	0	1
281			1	0	2	0	0	0	0	1	2	1	2	1	1	1	1	1	1	1	1	1	0	0	0	1	1	1	1	1	1	2	2	2	5	1	6	7	4	3	4	5	2	3	1	1	1	1	1
284																	0	0	0	0	0	0	0	0	0																					0	0	0	0
285																	0	0	0	0	0	0	0	0	0																					0	0	0	0
286	Racing competition		3	0	0	0	0	0	0	0	0	0	0	0	0	1	1	1	1	1	0	1	0	0	0	0	0	1	1	0	1	0	0	1	3	4	2	7	5	6	3	1	2	4	5	0	1	0	0
287	Pleasure or trail riding		2	1	1	0	0	0	0	0	0	0	0	0	0	1	1	1	1	1	1	1	0	0	0	1	1	1	1	1	1	1	1	5	2	3	6	4	1	7	2	3	1	4	5	1	1	0	1
288	Breeding		2	1	0	0	0	0	0	0	0	0	0	0	0	1	0	0	0	0	0	0	1	0	0	0	4	2	1	1	1	2	2	1	2	3	4	6	5	7	1	4	2	3	5	1	0	0	0
289	Non-racing competition		4	0	1	0	0	0	0	0	0	2	0	0	1	1	1	1	1	1	0	1	0	0	0	0	1	1	2	0	4	0	0	4	6	3	1	7	2	5	1	5	2	3	4	0	0	0	1
290	Pleasure or trail riding		1	1	2	0	0	0	0	2	2	2	2	2	2	1	1	1	1	1	1	1	0	0	0	0	1	1	1	1	1	1	1	1	7	2	3	5	4	6	1	3	4	2	5	1	1	0	1
291	Work (eg. Ranching, logging, outfitting, etc.)		0	0	4	0	0	0	0	0	0	0	0	1	1	1	1	1	1	1	1	1	1	0	0	0	0	0	1	3	0	2	3	5	3	1	4	2	7	6	3	1	5	4	2	1	1	1	1
294	Breeding		1	1	1	0	0	0	0	0	2	2	0	1	2	1	0	0	0	0	0	0	1	0	0	3	2	1	3	4	0	4	4	4	6	3	2	7	1	5	2	1	4	5	3	0	1	0	0
295	Riding or school lessons		1	4	4	0	0	0	0	0	2	2	0	2	2	1	0	0	0	1	0	1	0	0	0	0	0	0	2	3	2	2	2	2	5	1	3	7	4	6	1	4	5	2	3	1	1	1	1
296	Non-racing competition		2	1	2	0	0	0	0	0	1	1	1	1	2	1	1	1	1	1	1	1	0	0	0	0	1	1	1	2	3	1	1	2	6	1	4	7	3	5	4	2	1	3	5	1	1	0	1
297	Pleasure or trail riding		1	1	2	0	0	0	0	0	0	0	0	0	0	1	1	1	1	1	0	1	0	0	0	1	1	1	1	1	0	0	0	2	6	1	5	4	3	7	3	2	1	5	4	1	1	1	1
298			3	1	1	0	0	4	4	4	4	4	4	0	4	1	1	1	0	0	1	1	0	0	0	0	1	1	3	1	3	3	1	3	5	1	2	7	6	4	1	5	4	2	3	0	0	0	0
299	Other, please list:	pleasure driving	0	2	3	0	0	0	0	0	0	0	0	0	2	1	0	0	0	0	1	0	0	0	0	1	2	1	1	3	1	2	2	1	6	4	2	7	5	3	5	2	1	3	4	1	1	1	1
300	Non-racing competition		2	1	0	0	0	0	0	0	0	0	0	0	0		0	0	0	0	0	0	0	0	0																					0	0	0	0
301	Pleasure or trail riding		1	1	1	0	0	0	0	0	0	0	1	0	1		0	0	0	0	0	0	0	0	0																					0	0	0	0
302	Non-racing competition		2	1	1	0	0	0	0	0	0	0	0	0	0	1	1	0	0	0	1	0	0	0	0	1	2	0	0	3	2	0	0	4	3	1	5	6	2	7	4	5	3	2	1	1	1	0	0
303	Pleasure or trail riding		3	1	1	0	0	0	0	0	0	0	0	0	0	1	1	1	1	1	1	1	0	0	0	0	3	1	3	0	0	0	0	4	5	1	3	7	2	6	3	5	2	1	4	1	1	1	1
304	Other, please list:	showing on the quarter horse circuit	1	0	0	0	0	0	0	0	0	0	0	0	0	1	0	0	1	0	1	1	0	0	0	0	0	0	0	3	0	2	1													0	1	0	1
305																	0	0	0	0	0	0	0	0	0																					0	0	0	0
306			1	1	2	0	0	0	0	4	1	1	3	0	2	1	1	1	1	1	1	1	0	0	0	0	3	1	0	4	0	3	3	3	6	1	2	7	4	5	1	5	4	3	2	1	1	1	1
307	Non-racing competition																0	0	0	0	0	0	0	0	0																					0	0	0	0
308	Pleasure or trail riding		1	1	1	0	0	0	0	0	0	0	0	0	0	1	0	0	1	0	0	1	0	0	0	0	0	0	0	1	0	0	0													1	1	1	1
310																	0	0	0	0	0	0	0	0	0																					0	0	0	0
311	Companionship (eg. Retired horse, etc.)		4	0	0	0	0	0	0	0	0	2	0	0	2		0	0	0	0	0	0	0	0	0																					0	0	0	0
313	Companionship (eg. Retired horse, etc.)																0	0	0	0	0	0	0	0	0																					0	0	0	0
314	Work (eg. Ranching, logging, outfitting, etc.)		0	1	2	0	0	0	0	1	2	1	0	1	1	1	1	1	1	1	1	1	0	0	0	0	2	0	0	2	0	2	2	2	6	4	5	1	3	7	1	2	4	5	3	1	1	0	0
315	Breeding																0	0	0	0	0	0	0	0	0																					0	0	0	0
317	Horse therapy or rehabilitation			0	0	0	0	0	0	0	0	0	0	0	0	1	1	1	1	1	1	1	1	0	1	0	0	0	0	0		0	0	3	4	2	5	7	1	6	4	2	1	5	3	1	1	1	1
318	Pleasure or trail riding		4	0	0	0	0	1	2	1	2	2	1	1	1	1	0	0	0	0	0	1	0	0	0	0	2	1	1	0	0	0	0	4	6	3	1	5	2	7	2	4	1	3	5	1	1	1	1
319	Other, please list:	Dressage	4	0	0	0	0	0	0	0	0	1	0	0	0	0	0	0	0	0	0	0	0	0	0																					1	1	1	0
321			4	0	0	0	0	0	0	0	0	0	0	0	0	1	1	1	1	1	1	1	0	1	1	0	0	0	1	0	4	0	0	5	4	2	3	7	1	6	4	1	3	2	5	1	1	1	1
322	Pleasure or trail riding		1	1	1	1	1	1	1	1	1	1	1	1	1	1	1	1	1	1	1	1	0	0	0	0	0	0	2	0	4	0	0	2	6	3	7	1	4	5	2	5	3	4	1	0	1	0	0
323	Pleasure or trail riding		1	1	1	0	0	0	0	0	0	0	0	0	0	1	1	1	1	1	1	1	0	0	0	2	1	1	0	3	0	0	0	6	1	2	4	7	3	5	1	2	4	5	3	0	1	1	1
324	Riding or school lessons		4	0	0	0	0	0	0	0	0	0	0	0	0	0	0	0	0	0	0	0	0	0	0																					1	1	1	1
325	Riding or school lessons		1	1	2	1	1	1	1	2	2	2	2	2	2	1	0	0	0	0	0	0	0	1	0																					0	0	0	0
326	Pleasure or trail riding		1	0	0	0	0	0	0	0	0	0	0	0	0	1	1	1	1	1	1	1	0	0	0	0	0	0	0	0	0	0	0													1	1	0	1
327	Companionship (eg. Retired horse, etc.)		4	0	0	0	0	0	0	0	0	1	0	0	0	1	1	1	1	1	1	1	0	0	1	0	0	0		0	4	0	0	2	7	3	4	6	1	5	3	2	1	4	5	0	1	0	0
328	Riding or school lessons		2	1	2	0	0	0	0	1	1	0	1	0	0	1	1	1	0	1	0	1	0	0	0	0	0	0	1	1	0	0	0	4	3	6	2	7	5	1	1	4	2	5	3	0	0	0	0
329	Companionship (eg. Retired horse, etc.)		2	1	1	0	0	0	0	0	0	0	0	0	0	1	1	1	1	1	0	1	0	0	0	0	0	0	0	0		0														1	1	1	1
331	Riding or school lessons		1	1	1	0	0	0	0	0	0	0	0	0	0	1	0	0	1	1	1	1	0	0	0	0	0	0	0	0	0	0	0	3	6	1	4	5	2	7	1	2	3	4	5	0	1	0	1
332	Pleasure or trail riding		4	0	0	0	0	0	0	0	0	0	0	0	0	1	0	0	0	0	0	1	0	0	0	0	2	0	0	0	4	0	0	2	7	4	6	3	1	5	1	2	5	3	4	0	1	0	1
333	Pleasure or trail riding		4	0	2	0	0	0	0	0	1	1	1	1	1	1	0	0	0	0	0	1	0	0	0	0	1	1	1	0	4	2	2	3	5	4	2	7	1	6						0	0	0	0
334	Work (eg. Ranching, logging, outfitting, etc.)		3	1	1	0	0	0	0	0	0	1	0	0	2	1	0	0	0	0	0	0	1	0	0	0	0	1	1	1	1	1	0	4	1	6	7	2	3	5	5	4	3	1	2	0	1	0	1
335	Other, please list:	Several of the above	4	0	0	0	0	0	0	0	0	3	0	0	0	1	0	0	0	1	0	1	0	1	0	0	0	0		0		0	0	6	4	2	3	7	1	5	2	4	5	3	1	0	0	0	0
337	Pleasure or trail riding		4	0	1	0	0	0	1	0	0	0	2	0	0	1	1	1	1	1	1	1	1	0	0	1	2	1	1	0	4	0	0	2	4	1	7	6	3	5	1	3	2	5	4	1	0	0	1
338	Pleasure or trail riding		4	0	0	0	0	0	0	0	0	4	4	0	0	1	0	0	0	1	0	1	0	0	1																					0	0	0	0
339	Non-racing competition		0	2	4	0	0	0	0	0	0	0	0	0		1	0	0	0	0	0	0	1	0	0																					0	0	0	0
341	Pleasure or trail riding		4	0	0	0	0	0	0	0	0	0	0	0	1	1	1	1	1	1	1	1	0	0	0	0	0	0	0	0	4	0	0	4	5	3	2	7	1	6	3	2	1	4	5	1	1	1	1
342			2	0	0	0	0	0	0	0	0	0	0	0	0	1	1	1	1	1	1	1	0	0	0	0	0	0	0	0	4	0	0	3	6	4	2	7	1	5	3	2	1	4	5	1	1	1	1
343	Non-racing competition		1			1	1	1	1	2	2	3	1	1	3		0	0	0	0	0	0	0	0	0																					0	0	0	0
344			3	3	3	3	3	3	3	3	3	3	3	3	3	1	1	1	0	1	0	1	0	0	0	0		0	0	0		0	0	3	2	1	6	4	5	7	4	2	1	3	5	1	1	1	1
345			4	0	1	0	0	0	0	1	1	1	1	1	1	1	0	1	0	0	0	1	0	0	0	0	1	1	0	0	0	0	0								1					1	1	1	1
346	Companionship (eg. Retired horse, etc.)		4	0	0	0	0	0	0	0	0	2	2	0	0	1	0	0	0	1	1	1	0	0	0	0	1	0	1	0	0	0	0	4	3	2	5	6	1	7	1	2	3	5	4	0	0	1	1
348	Pleasure or trail riding			0	1	0	0	0	0	0	0	0	0	0	0		0	0	0	0	0	0	0	0	0																					0	0	0	0
349	Pleasure or trail riding		4	0	1	0	0	0	0	0	0	0	0	0	0	1	1	1	1	1	1	1	1	0	0	0	0	0	0	0	4	0	0	1	4	3	6	7	5	2	1	4	5	3	2	1	1	1	1
350	Pleasure or trail riding																0	0	0	0	0	0	0	0	0																					0	0	0	0
352																	0	0	0	0	0	0	0	0	0																					0	0	0	0
353	Pleasure or trail riding		2	1	1	0	0	0	0	0	0	0	0	0	0	1	1	1	1	1	1	1	0	0	1	0	2	0	1	0	3	0	0	4	6	3	2	5	1	7	3	2	1	5	4	1	1	1	1
355																	0	0	0	0	0	0	0	0	0																					0	0	0	0
357	Companionship (eg. Retired horse, etc.)		3	0	0	0	0	0	0	0	0	0	0	0	0	1	0	1	0	0	0	1	0	0	0	0	0	1	1	0	1	0	0	1	5	4	3	7	2	6	1	4	2	3	5	1	1	1	1
359	Pleasure or trail riding		0	0	0	0	0	0	0	0	0	0	0	0	0	1	0	0	0	0	0	1	0	0	0	1	1	1	2	2	2	2	2	1	3	2	7	6	5	4	1				2	0	1	0	0
360			2	0	0	0	0	0	0	1	1	0	0	0	1	1	1	1	0	1	0	1	0	0	0	0	1	0	0	0	0	2	1	1	6	4	2	7	3	5	1	3	5	2	4	1	1	1	1
361	Other, please list:	Dressage	4	0	0	0	0	0	0	0	0	0	0	0	0	0	0	0	0	0	0	0	0	0	0																					1	1	1	1
362	Pleasure or trail riding		4	0	0	0	0	0	0	0	0	0	0	0	0	1	1	1	0	0	0	1	0	0	0	0	1	1	1	0	0	0	0	4	5	3	2	7	1	6	4	2	1	3	5	0	1	1	1
363	Pleasure or trail riding		3	1	0	0	0	0	0	0	0	0	0	0	0	1	0	0	0	0	0	1	0	0	0	0	2	1	3	1	1	0	0	2	5	3	7	6	1	4	3	2	1	5	4	1	1	1	1
365	Pleasure or trail riding		3	0	0	0	0	0	0	0	0	3	3	0	0	1	1	1	1	1	1	1	0	0	0	0	0	1	2	0	4	0	0	6	4	5	3	1	2	7	1	4	5	3	2	0	1	0	0
366	Pleasure or trail riding		1	0	0	0	0	0	0	0	0	0	0	0	0	1	1	0	0	0	1	1	0	0	0	2	3	1	1	2	3	1	1	3	6	1	7	5	2	4	1	2	5	4	3	0	1	1	1
367			3	1	2	0	0	1	1	1	1	1	1	1	1	1	0	0	0	1	1	0	0	0	0	0			1	0	0	0	0	3			1		2		3	2	1	4	5	0	1	0	0
369			1	1	1	1	1	1	1	1	1	1	1	1	2	1	1	1	1	1	1	1	0	0	0	1	0	0	0	1	1	0	0	1	5	2	3	6	4	7	1	3	2	4	5	0	1	1	1
370			4	0	0	0	0	0	1	1	0	1	1	0	0	1	1	1	1	1	1	1	0	0	0	0	1	0	1	0	4	0	0	4	6	5	3	2	1	7	5	3	1	2	4	0	0	0	1
371	Pleasure or trail riding		1	0	0	0	0	0	0	0	0	0	0	0	0	1	1	1	0	1	0	1	0	0	0	0	0	0	0	0	4	0	0	3	6	4	5	7	1	2	1	5	4	2	3	1	1	1	1
372	Horse therapy or rehabilitation		4	0	0	0	0	0	0	0	0	0	0	0	0	1	0	1	0	1	0	1	0	0	1	0	3	3	3	0	4	0	0	7	6	4	2	3	1	5	3	4	5	2	1	0	0	0	0
374	Pleasure or trail riding			0	0	0	0	0	0	0	0	0	0	0	0	1	1	1	1	1	1	1	0	0	0	0	0	0	0	0	0	0	0	1		2	5		4	3		1	2	4	3	0	0	1	0
375	Breeding		1	1	2	0	0	0	0	0	3	3	3	3	3	1	1	1	1	1	1	1	0	0	0	0	1	0	1	3	0	1	1													0	1	0	1
376	Pleasure or trail riding		0	0	4	0	0	0	0	2	4	4	4	4	4	1	1	1	1	1	1	1	0	0	0	0	1	0	1	3	0	1	1	5	3	2	1	7	4	6	2	1	3	5	4	0	1	0	1
377	Pleasure or trail riding		1	0	1	0	0	0	0	0	0	0	0	0	0	1	0	0	0	0	0	1	0	0	0	0	1	0	1	0	0	1	1	3	2	1	6	7	4	5	1	3	2	4	5	0	1	0	0
378	Other, please list:	They have not been trained yet for riding still young.	4	0	0	0	0	0	0	0	0	0	0	0	0	1	0	1	0	1	0	1	1	0	0		0	2	0	0	4	0	0	6	4	5	3	2	1	7	3	2	1	5	4	0	0	0	0
379	Companionship (eg. Retired horse, etc.)		1	2	0	0	0	0	0	0	0	0	0	0	0	1	0	1	0	1	0	1	0	0	0	0	2	0	0	0	0	0	0	2	5	4	1	3	6	7	1	4	5	3	2	0	0	1	0
381	Companionship (eg. Retired horse, etc.)			0	0	0	0	0	0	0	0	0	0	0	0	1	1	1	0	1	1	1	0	0	0	0	2	2	0	0		0	0	3	5	4	2	7	1	6	5	2	1	4	3	0	0	1	1
382	Companionship (eg. Retired horse, etc.)		1	0	1	0	0	0	0	0	0	0	0	0	0	1	1	0	1	0	0	1	0	0	0	0	2	1	3	0	3	0	0	1	2	5	6	7	4	3	4	2	3	1	5	1	1	0	0
383	Pleasure or trail riding		4	0	0	0	0	0	0	0	0	1	1	0	0	1	1	1	1	1	1	1	0	0	0	0	0	1	1	0	0	0	0	1	5	3	4	7	6	2	2	4	5	3	1	0	1	0	0
384	Other, please list:	Helping to keep me fit and healthy.	4	0		0	0	0	0	0	0	0	0	0	0	1	1	1	1	1	1	1	0	0	0	1	1	1	3	0	4	1	0	6	4	3	2	5	1	7	1					0	1	0	0
385																	0	0	0	0	0	0	0	0	0																					0	0	0	0
386			1	1	3	0	0	0	0	0	0	0	0	0	0		0	0	0	0	0	0	0	0	0																					0	0	0	0
387	Pleasure or trail riding																0	0	0	0	0	0	0	0	0																					0	0	0	0
388	Horse therapy or rehabilitation		4	1	0	0	0	0	0	0	0	0	0	0	0	1	1	1	1	1	1	1	0	0	0	0	0	0	1	0	1	0	0	4	6	3	2	7	1	5	4	2	1	3	5	1	1	1	1
389	Pleasure or trail riding		1	1	1	1	1	1	1	1	1	1	1	1	1	1	0	0	0	0	0	1	0	1	0	1	2	1	1	2	2	1	1	1	2	3	7	6	4	5	1	2	3	4	5	1	0	0	0
390	Pleasure or trail riding		1	1	1	0	0	0	0	1	1	3	1	0	1	1	1	1	0	0	0	1	0	0	0	1	3	1	1	0	3	0	0													0	1	0	1
391	Other, please list:	Racing and Breeding facility	0	0	0	0	0	0	0	0	0	0	0	0	0		0	0	0	0	0	0	0	0	0																					0	0	0	0
392	Non-racing competition		3	1	1	0	0	0	0	0	0	0	0	0	0	1	0	0	0	0	0	1	0	0	0	0	3	0	0	0	4	0	0	1	2	5	6	4	3	7	4	2	1	3	5	1	1	0	1
394	Pleasure or trail riding		4	0	2	0	0	0	0	1	1	1	2	1	0	1	0	0	0	0	0	0	1	1	0	0	1	1	1	0	1	1	1	4	6	3	5	2	1	7	2	1	5	4	3	0	1	0	1
395	Riding or school lessons		3	1	2	0	0	0	0	0	0	0	0	0	0		0	0	0	0	0	0	0	0	0																					0	0	0	0
397	Pleasure or trail riding		1	0	3	0	0	0	0	2	0	3	1	0	1	1	1	1	1	1	1	1	1	1	0	1	0	1	1	2	2	2	2													0	1	0	0
398																	0	0	0	0	0	0	0	0	0																					0	0	0	0
399	Other, please list:	Driving, riding,breeding, work	0	4	4	0	0	0	0	0	0	0	0	0	0	1	1	1	1	1	1	1	0	0	0	0	0	0	0	0	0	0	0	5	6	3	1	2	4	7	5	2	1	3	4	1	1	1	1
400	Other, please list:	dressage	1	0	0	0	0	0	0	0	2	2	2	2	2	1	1	1	1	1	1	1	0	0	0	1	1	0	4	0	2	0	0	4	3	1	2	6	5	7	3	1	5	2	4	0	1	0	1
401	Pleasure or trail riding		4	0	0	0	0	0	0	0	0	0	0	0	0	1	1	1	1	1	1	1	0	0	0	0		0	0	0	4	0	0	6	4	3	5	1	2	7	4	3	1	2	5	1	1	1	1
402	Other, please list:	Driving, agility, liberty work	3	0	0	0	0	0	0	0	0	0	0	0	1	1	1	1	0	1	1	1	0	0	0	0	0	1	1	0	4	0	0	1	6	5	4	7	3	2	4	2	1	3	5	1	1	1	1
403			4	0	0	0	0	0	0	0	2	2	0	0	0		0	0	0	0	0	0	0	0	0																					0	0	0	0
404	Non-racing competition		0	0		0	0	0				0				1	1	1	1	1	0	1	0	0	0	0	2	0	1	2	0	0	0													0	1	0	1
405	Pleasure or trail riding		0	0	0	0	0	0	0	0	0	0	0	0	0	1	1	1	1	1	1	1	0	0	0	0	0	0	0	2	0	0	0	2	6	1	7	3	4	5	1	3	2	4	5	1	1	1	1
406	Pleasure or trail riding		3	0	1	0	0	0	0	0	0	0	0	0	0	1	1	1	1	1	1	1	0	0	0	0	2	1	1	0		0	0	2	5	1	6	4	3	7	2	5	1	3	4	0	1	0	1
407	Other, please list:	I have two retired, one in competition with my daughter and two in training	1	0	0	0	0	0	0	2	2	2	0	2	2	1	0	0	0	0	0	0	1	0	0	1	1	0	1	0	2	1	1	3	6	1	2	7	4	5	1	2	3	5	4	0	1	0	0
409	Horse therapy or rehabilitation		4	0	0	0	0	0	0	0	0	0	0	0	0	1	0	1	1	0	0	1	0	0	1	4	4	4	4	4	4	0	0	7	5	4	3	2	1	6	1	3	2	4	5	1	0	0	0
410	Pleasure or trail riding		2	1	0	0	0	0	0	0	0	1	0	0	2	1	1	1	1	1	1	1	0	0	0	1	1	0	0	0	2	1	1	3	5	1	2	7	4	6	3	4	5	2	1	1	1	1	1
411	Pleasure or trail riding		1	1	1	0	0	0	0	0	0	2	0	0	1	1	1	1	1	1	0	1	0	0	0	0	2	1	2	1	1	0	0	5	7	3	1	6	2	4	1	3	2	4	5	0	1	0	0
412	Companionship (eg. Retired horse, etc.)		4	0	1	0	0	1	1	1	1	2	1	1	2	1	1	1	0	1	0	1	0	0	1	0	0	0	2	0	4	0	0	5	6	4	3	2	1	7	3	2	1	4	5	0	1	1	1
414	Riding or school lessons		4	0	0	0	0	0	0	0	0	0	0	0	0	1	1	0	0	1	0	1	0	0	0	0	1	1	2	0	3	0	0	1	6	2	3		4	5	1	2	3	4	5	1	1	1	1
415	Other, please list:	my pleasure & my passion	4	0	0	0	0	0	0	0	0	0	0	0	0	1	0	0	0	0	0	1	0	0	0	0	0	0	0	0	4	0	0	2	3	4	5	7	1	6	1	4	5	2	3	0	0	0	0
416	Pleasure or trail riding		2	2	3	0	0	0	0	1	1	1	1	1	1	1	1	0	1	0	1	1	0	0	0	1	1	0	1	3	1	0	0	2	4	1	3	7	6	5	2	4	3	1	5	1	1	1	1
417	Pleasure or trail riding		1	0	0	0	0	0	0	0	0	0	0	0	0	1	1	1	0	1	1	1	0	0	0	1	3	0	1	0	4	1	2	4	6	2	3	7	1	5	2	5	4	1	3	1	1	1	1
418	Pleasure or trail riding		3	1	1	0	0	0	0	0	0	0	1	0	0	1	1	1	1	1	1	1	0	0	0	0	1	0	0	0	4	0	0	3	5	4	2	6	1	7	3	2	1	4	5	0	1	0	1
419	Companionship (eg. Retired horse, etc.)																0	0	0	0	0	0	0	0	0																					0	0	0	0
420	Pleasure or trail riding		3	1	1	0	0	0	0	0	3	3	0	2	2	1	0	0	0	0	0	1	0	0	0	0	1	1	1	0	2	0	0	5	2	3	6	1	4	7	3	2	1	5	4	0	1	1	1
421	Other, please list:	As family members	4	0	0	0	0	0	0	0	0	0	0	0	0	1	1	1	1	1	1	1	0	0	1	0	0	0	0	0	4	0	0	3	5	2	4	7	1	6	4	5	1	2	3	0	0	1	0
423	Companionship (eg. Retired horse, etc.)		0	0	2	0	0	0	0	0	0	0	0	0	0	1	1	1	1	1	1	1	0	0	0	0	0	0	0	0	4	0	0	3	5	1	2	6	7	4	2	4	5	3	1	0	1	1	1
424	Riding or school lessons		2	1	1	0	0	0	0	0	0	0	0	0	0	1	0	0	1	0	0	1	0	0	0	0	2	0	2	0	4	0	0	1	6	2	5	7	4	3	1	4	5	2	3	0	1	0	1
425	Pleasure or trail riding		0	0	0	0	0		0	0	0	0	0	0	0		0	0	0	0	0	0	0	0	0																					0	0	0	0
426	Pleasure or trail riding		4	0	3	0	0	0	0	0	0	1	1	0	0	1	0	0	0	1	0	1	0	0	0	0	0	0	1	0	3	0	0	3	5	4	2	7	1	6	2	5	1	3	4	1	1	0	0
428			1	1	0	0	0	0	0	0	0	0	0	0	0	1	0	0	0	0	0	1	0	0	0	1	2	0	0	0	0	0	0													1	1	0	1
430	Riding or school lessons		4	1	2	0	0	0	0	0	1	0	0	0	2	1	0	1	0	1	0	1	0	0	0	1	1	2	0	0	2	2	2	4	6	7	3	2	1	5	4	1	2	3	5	1	1	0	0
432	Pleasure or trail riding		4	1	1	0	0	0	0	0	0	0	0	0	0	1	1	1	1	1	1	1	0	0	0	0	0	0	1	0	2	0	0	5	3	4	2	7	1	6	3	4	1	5	2	1	1	1	1
434			4	0	0	0	0	0	0	0	0	0	0	0	0	1	1	1	0	1	1	1	0	0	1	0	0	0	0	0	2	0	0	3	5	4	2	6	1	7	2	3	1	4	5	1	1	1	1
435	Companionship (eg. Retired horse, etc.)		1	0	0	0	0	0	0	0	0	0	0	0	0	1	1	1	1	1	1	1	0	0	0	0	0	0	0	0	4	0	0	4	6	1	2	3	7	5	5	1	3	2	4	1	0	0	0
436	Non-racing competition		1	1	1	1	1	1	1	1	1	1	1	1	1	1	0	1	0	1	0	1	0	0	0	0	1	0	1	0	1	0	0													1	1	1	1
437																	0	0	0	0	0	0	0	0	0																					0	0	0	0
438			3	0	0	0	0	0	0	0	0	0	0	0	0	1	1	1	1	1	1	1	0	0	0	0	0	0	1	4	4	0	0	5	7	2	1	3	6	4	3	2	1	4	5	1	1	0	0
440	Riding or school lessons		1	1	0	0	0	0	0	0	1	1	1	1	1	1	1	1	1	1	1	1	0	0	0	0	0	0	0	2	1	1	1	4	2	3	6	7	1	5	1	3	5	4	2	1	1	1	1
441																	0	0	0	0	0	0	0	0	0																					0	0	0	0
442	Pleasure or trail riding		2	0	0	0	0	0	0	0	0	0	0	0	0	1	1	1	1	1	1	1	0	0	0	0	0	0	1	0	2	0	0	4	3	2	1	7	6	5	1	3	4	2	5	1	1	1	0
444	Riding or school lessons		2	0	1	0	0	0	0	0	0	0	0	0	0	1	1	1	1	1	1	1	0	0	0	0	1	1	1	0	2	1	0	3	5	2	7	6	1	4	3	1	2	4	5	0	1	0	0
445			3	0	0	0	0	2	0	0	2	2	0	1	1	1	1	0	0	1	0	1	0	0	0	0	0	0	0	1	0	0	0	3	7	1	2	6	5	4	1	2	3	4	5	1	1	1	1
446	Pleasure or trail riding		1	1	3	0	0	0	0	0	0	1	0	1	1	1	1	1	1	1	1	1	0	0	0	0	0	0	2	1	2	0	0	2	4	3	5	7	6	1	1	4	5	2	3	0	1	1	1
449																	0	0	0	0	0	0	0	0	0																					0	0	0	0
450																	0	0	0	0	0	0	0	0	0																					0	0	0	0
451	Pleasure or trail riding		2	0	0	1	1	1	1	1	1	1	1	1	1	1	1	1	0	1	0	1	0	0	0	1	1	0	2	2	2	0	0	6	3	2	5	1	4	7	3	2	1	4	5	1	1	1	1
452																	0	0	0	0	0	0	0	0	0																					0	0	0	0
455	Riding or school lessons		1	1	2	0	0	0	0	1	1	2	1	1	1	1	0	0	0	0	0	1	0	0	0	1	2	2	3	1	2	1	1	4	5	2	7	1	3	6	3	1	2	5	4	0	1	1	1
456	Pleasure or trail riding		0	0	0	0	0	0	0	0	0	0	0	0	0	1	0	0	0	0	0	1	0	0	0	0	3	0	1	0	0	2	0	1	7	5	6	3	2	4	4	2	1	3	5	1	1	0	1
457																	0	0	0	0	0	0	0	0	0																					0	0	0	0
458																	0	0	0	0	0	0	0	0	0																					0	0	0	0
460	Other, please list:	pleasure driving	1	1	1	0	0	0	0	1	2	1	1	2	2		0	0	0	0	0	0	0	0	0																					1	1	1	1
461	Pleasure or trail riding		4	1	1	0	0	0	0	0	0	0	0	0	0	1	1	1	0	1	0	1	0	0	0	0	1	0	1	0	4	0	0	5	6	4	3	2	1	7	3	2	1	4	5	1	1	0	1
462	Other, please list:	we currently have eventing competition horses, percherons for driving, trail horses and non competition jumping horses. we start and train horses using natural horsemanship methods. we also run lessons for kids with special needs. i.e. autism and developmental delay.	3	2	2	0	0	0	0	0	0	1	1	1	1		0	0	0	0	0	0	0	0	0																					0	0	0	0
463			1	1	3	1	1	1	1	1	1	2	1	1	1	1	0	0	0	1	0	1	0	0	0	0	1	1	2	1	1	0	0	3	1	2	4	7	6	5	2	4	5	3	1	1	1	1	1
464																	0	0	0	0	0	0	0	0	0																					0	0	0	0
465			2	1	3	0	0	0	0	0	0	1	0	0	1	1	1	1	1	1	1	1	0	0	0	1	1	1	1	1	1	1	0	1	6	3	5	7	4	2	3	2	1	5	4	1	1	1	1
467	Pleasure or trail riding		3	0	0	0	0	0	0	0	0	0	0	0	0		0	0	0	0	0	0	0	0	0																					0	0	0	0
469	Work (eg. Ranching, logging, outfitting, etc.)		1	1	1	0	0	0	0	0	0	0	0	0	0	1	1	1	1	1	1	1	0	0	0	2	2	0	1	0	3	2	2	5	1	2	3	7	4	6	2	3	4	1	5	0	1	0	1
470																	0	0	0	0	0	0	0	0	0																					0	0	0	0
471																	0	0	0	0	0	0	0	0	0																					0	0	0	0
473	Pleasure or trail riding		4	0	0	0	0	0	0	0	1	1	2	0	0	1	0	0	0	1	0	1	0	0	0	1	1	1	2	0	2	0		1	2	6	7	3	4	5	1	3	4	5	2	1	1	0	1
474																	0	0	0	0	0	0	0	0	0																					0	0	0	0
477	Pleasure or trail riding			0	0	0	0	0	0	0	0	0	0	0	0	1	1	1	1	1	1	1	0	0	0	0	4	0		0	3	0	0													1	1	1	1
478	Pleasure or trail riding		1	0	0	0	0	0	0	0	0	0	0	0	0	1	1	1	1	1	1	1	0	0	0	0	0	0	0	0	0	0	0													0	1	0	1
480	Pleasure or trail riding					0	0	0	0	0						1	0	0	0	0	0	1	1	0	0	1	1	0		1			1													1	1	0	1
481	Riding or school lessons		1	1		0	0	0	0	0	0	0	0	0	0	1	0	1	0	1	0	1	0	0	1	0	0	0	1	0	0	0	0	3	6	2	7	4	1	5	4	2	1	3	5	1	1	0	1
483			3	1	1	0	0	0	0	0	0	0	0	0	0	1	0	0	0	0	0	0	0	0	0	0	1	1	1	0		1	1													0	1	0	1
485			3	1	2	0	0	0	0	2	2	2	0	0	2	1	1	1	1	1	1	1	0	0	0	0	0	0	1	2	0	0	0	3	6	2	1	7	4	5	2	4	3	5	1	1	1	1	1
487																0	0	0	0	0	0	0	0	0	0																					0	0	1	1
490	Non-racing competition		1	1	4	0	0	0	0	0	0	0	1	0	0	1	1	1	1	1	1	1	0	0	0	0	0	0	0	0	0	0	0	3	6	1	2	5	7	4	1	3	4	2	5	1	1	0	1
491																	0	0	0	0	0	0	0	0	0																					0	0	0	0
493	Non-racing competition		2	1	1	0	0	0	0	0	0	0	0	0	0	1	1	1	0	0	0	1	0	0	0	0	2	1	3	0	4	0	0	6	7	1	4	5	2	3	3	2	1	5	4	1	1	1	1
494	Pleasure or trail riding																0	0	0	0	0	0	0	0	0																					0	0	0	0
495	Pleasure or trail riding		3	0	0	0	0	0	0	0	0	0	0	0	0	1	0	0	0	0	0	1	0	0	0	1	3	0	0	0	3	0	0													1	0	0	0
496	Pleasure or trail riding		4	0	0	0	0	0	0	0	0	0	0	0	0	1	0	1	0	0	0	1	1	0	0	0	0	0	1	0	4	0	0													0	0	1	1
497	Pleasure or trail riding		3	0	2	0	0	0	0	0	0	1	1	0	0	1	1	1	1	1	1	1	0	0	0	0	1	1	2	0	2	0	0													0	1	1	1
499			4	0	0	0	0	0	0	0	0	0	0	0	0	1	0	1	0	0	0	1	0	0	0	4	2	0	4	4	0	0	0	3	5	4	2	7	1	6	5	1	3	2	4	0	1	1	1
500																	0	0	0	0	0	0	0	0	0																					0	0	0	0
501	Non-racing competition		3	1	1	0	0	0	0	0	0	2	2	1	1	1	1	0	0	1	0	1	0	0	0	1	1	0	1	1	2	1	0	3	4	2	1	7	6	5	3	2	1	4	5	1	1	0	1
502																	0	0	0	0	0	0	0	0	0																					0	0	0	0
503																	0	0	0	0	0	0	0	0	0																					0	0	0	0
504			4	0	0	0	0	0	0	0	0	0	0	0	0	1	1	1	1	1	1	1	0	0	0	0	0	0	0	0	4	0	0	4	5	6	2	3	1	7	4	3	1	2	5	1	1	1	1
505																	0	0	0	0	0	0	0	0	0																					0	0	0	0
506			1	0	0	0	0	0	0	0	0	0	0	0	0	1	1	1	1	1	1	1	0	0	0																					0	0	0	0
507	Pleasure or trail riding		1	0	1	0	0	0	0	0	0	0	0	1	1	1	0	1	0	1	0	1	0	0	0	1	1	1	1	0	2	0	0	5	6	3	2	7	1	4	4	1	2	3	5	1	1	0	1
508	Other, please list:	Combined driving	0	1	1	0	0	0	0	0	0	0	0	0	1	1	1	1	1	1	1	1	0	0	0	1	1	0	1	2	0	2	2	5	4	3	7	6	2	1	1	4	5	3	2	1	1	0	1
509	Non-racing competition		1	3	2	0	0	0	0	0	1	0	0	1	2	1	1	1	1	1	1	1	0	0	0	0	3	2	2	0	2	0	0	4	5	1	3	7	2	6	5	2	1	3	4	1	1	1	1
510	Pleasure or trail riding		3	1	0	0	0	0	0	0	0	0	0	0	0	1	1	1	1	1	1	1	0	0	0	0	2	0	0	0	0	0	0													1	1	1	1
511	Companionship (eg. Retired horse, etc.)		1	2	3	0	0	0	0	0	0	0	0	0	0	1	1	1	1	1	1	1	0	0	0	2	2	0	0	0	0	0	0	2	3	5	6	7	1	4	3	4	5	1	2	1	0	0	0
514	Breeding		0	0	4	0	0	0	0	0	0	0	0	0	4		0	0	0	0	0	0	0	0	0																					0	0	0	0
515	Non-racing competition		3	0	0	0	0	0	0	0	2	0	2	0	0	1	1	1	1	1	1	1	0	0	0	1	0	0	1	2	1	1	1	5	6	4	1	7	2	3	4	1	3	2	5	0	1	0	1
516	Pleasure or trail riding		4	0	0	0	0	0	0	0	0	0	0	0	0	1	0	0	0	0	0	1	0	0	0	0	3	0	2	0	0	0	0													1	1	1	1
518	Pleasure or trail riding		4	1	0	0	0	0	0	1	1	1	1	0	0	1	0	1	0	1	0	1	0	0	0	2	3	1	2	0	4	0	0	6	7	3	2	4	1	5	5	2	1	4	3	0	0	0	1
521	Non-racing competition		0	0	1	0	0	0	0	1	2	2	1	2	2	1	1	1	1	0	1	1	0	0	0	1	2	2	2	2	0	2	1	1	5	2	4	7	6	3	1	5	2	3	4	0	1	0	1
523	Pleasure or trail riding		0	1	1	0	0	0	0	3	1	3	0	0	2	1	1	1	1	1	1	1	0	0	0	3	3	0	3	4	4	3	1	4	3	1	5	7	6	2	1	5	4	3	2	1	1	1	1
525			4	0	1	0	0	0	0	0	0	2	1	1	1	1	1	0	0	1	1	1	0	0	0	0	1	0	1	0		0	0	4	5	2	3	7	1	6	1	3	2	4	5	0	1	1	1
526	Pleasure or trail riding			0	0	0	0	0	0	0	0	0	0	0	0		0	0	0	0	0	0	0	0	0																					0	0	0	0
527	Pleasure or trail riding		1	0	0	0	0	0	0	0	0	1	0	1	1	1	1	1	1	1	1	1	0	0	0	0	0	0	1	1	1	0	0													0	1	0	1
528																	0	0	0	0	0	0	0	0	0																					0	0	0	0
529	Pleasure or trail riding		1	0	1	0	0	0	0	0	0	0	0	0	0	1	0	0	0	1	0	1	0	0	0	0	2	0	1	0	4	0	0	3	4	2	5	1	6	7	4	1	2	5	3	0	1	0	1
530	Pleasure or trail riding		1	0	1	0	0	0	0	0	0	0	0	0	1	1	1	1	1	1	1	1	0	0	0	1	1	1	1	2	0	0	0	2	6	1	3	7	5	4	1	3	2	4	5	1	1	0	1
531	Pleasure or trail riding		3	1	1	0	0	0	0	0	0	0	0	0	0	1	0	1	0	1	0	1	0	0	1	0	0	0	0	0	0	0	0	4	6	5	3	2	1	7	3	2	1	4	5	0	1	0	0
532																	0	0	0	0	0	0	0	0	0																					0	0	0	0
533																	0	0	0	0	0	0	0	0	0																					0	0	0	0
535	Work (eg. Ranching, logging, outfitting, etc.)		0	1	4	0	0	1	1	3	3	3	3	3	3	1	1	1	1	1	1	1	0	0	0	1	2	1	1	2	0	1	0	4	7	3	2	6	1	5	3	2	1	4	5	1	1	1	1
538	Pleasure or trail riding		1	1	4	0	0	0	0	0	0	0	0	0	2		0	0	0	0	0	0	0	0	0																					0	0	0	0
539	Pleasure or trail riding		0	0	0	0	0	0	0	0	1	0	0	0	0	1	0	0	0	0	0	1	0	0	0																					0	0	0	0
540	Pleasure or trail riding		0	1	2	0	0	0	0	1	1	2	1		2	1	1	1	0	0	0	1	0	0	0	1	1	1	1	1	1	1	1	3	1	2	4	7	5	6	1	4	5	2	3	1	0	0	0
541	Pleasure or trail riding		3	0	1	0	0	0	0	0	0	0	0	0	0	1	0	0	0	0	0	1	0	0	0	1	2	2	2	1	2	0	0													0	1	0	0
542	Pleasure or trail riding		3	0	0	0	0	0	0	0	0	0	0	0	0	1	1	1	1	1	1	1	0	0	0	0	0	0	0	0	3	1	1	1	3	2	4	7	6	5	2	4	5	3	1	1	1	1	1
544	Companionship (eg. Retired horse, etc.)		3	0	1	0	0	0	0	0	0	0	0	0	1	1	0	0	0	1	0	1	0	0	0	1	2	2	1	0	4	0	0	5	4	1	2	7	3	6	5	4	2	1	3	1	0	0	0
545	Breeding		1	0	0	0	0	0	1	0	2	0	2	0	2	1	0	0	1	1	1	1	0	0	0	0	1	0	1	0	2	1	0	6	1	3	4	5	2	7	4	2	1	3	5	1	1	1	1
546	Pleasure or trail riding		4	0	0	0	0	0	0	2	2	0	0	2	2	1	1	1	0	1	0	1	0	0	0	0	0	0	0	0	4	0	0	3	5	1	2	7	6	4	5	1	2	4	3	0	1	1	1
547	Pleasure or trail riding																0	0	0	0	0	0	0	0	0																					0	0	0	0
548																	0	0	0	0	0	0	0	0	0																					0	0	0	0
549	Non-racing competition		0	1	1	0	0	0	0	0	0	1	0	1	1	1	1	1	1	1	1	1	0	0	0	0	1	0	2	4	0	1	0	7	2	1	4	6	3	5	2	4	5	3	1	1	1	0	1
550			4	0	0	0	0	0	0	0	0	0	0	0	0	1	1	1	1	1	1	1	0	0	0	2	2	1	2	0	3	0	0	3	5	6	4	1	7	2	3	4	5	1	2	1	1	1	1
551	Pleasure or trail riding		1	0	3	0	0	0	0	0	0	0	0	0	1	1	1	1	0	1	1	1	0	0	0	0	1	1	1	0	1	0	0	4	7	1	3	6	2	5	1	5	4	3	2	1	1	1	0
552	Pleasure or trail riding		2	0	1	0	0	1	1	1	1	0	0	0	1	1	0	1	0	0	0	1	0	0	0	1	2	2	1	1	2	1	1	2	7	1	5	6	4	3	1	4	5	2	3	1	1	1	1
553			2	1	2	0	0	0	0	0	0	2	0	0	0	1	1	1	1	1	1	1	0	0	0	0	2	1	0	3	0	1	1	2	4	1	3	7	6	5	1	4	5	2	3	0	1	0	1
556			2	0	0	0	0	0	0	0	0	0	0	0	0	1	0	1	0	1	0	1	0	0	0	1	2	1	1	1	3	1	1	1	6	4	2	7	3	5	1	3	5	2	4	0	1	0	1
557	Pleasure or trail riding		1	0	0	0	0	0	0	0	0	0	0	0	0	1	1	1	1	1	1	1	0	0	0	1	2	1	1	2	1	1	0													1	1	0	1
558	Non-racing competition		1	0	0	0	0	0	0	0	0	0	0	0	0	1	1	1	1	1	1	1	0	0	0	0	0	0	0	0	0	0	0	1	4	2	6	3	7	5	1	4	5	2	3	1	1	1	1
559	Companionship (eg. Retired horse, etc.)		4	2	1	0	0	0	0	0	0	0	0	0	0		0	0	0	0	0	0	0	0	0																					0	0	0	0
561	Other, please list:	2 retired show horses, 1 current horse I compete with	0	0	0	0	0	0	0	0	0	0	0	0	0	1	1	1	1	1	1	1	1	0	0	1	1	1	1	1	1	1	1	1	5	2	6	7	4	3	2	4	3	1	5	1	1	1	1
562																	0	0	0	0	0	0	0	0	0																					0	0	0	0
563	Companionship (eg. Retired horse, etc.)		4	1	1	0	0	0	0	0	0	0	0	0	0	1	1	1	1	1	1	1	0	0	0	0	2	0	3	0	4	0	0	6	5	4	3	1	2	7	1	3	2	4	5	1	1	1	1
564																	0	0	0	0	0	0	0	0	0																					0	0	0	0
565	Work (eg. Ranching, logging, outfitting, etc.)		0	1	2	0	0	0	0	0	0	0	0	0	2	1	1	1	1	1	1	1	0	0	0	1	0	1	1	4	0	2	2	4	6	3	5	7	2	1	2	3	5	4	1	1	1	1	1
566	Pleasure or trail riding		1	1	1	0	0	0	0	1	1	3	1	1	2	1	1	1	1	1	1	1	0	0	0	0	0	0	0	0	2	1	0	6	4	3	7	1	2	5	2	5	1	3	4	1	1	1	1
567																	0	0	0	0	0	0	0	0	0																					0	0	0	0
568	Pleasure or trail riding		3	0	0	0	0	0	0	0	0	0	0	0	0	1	1	1	0	1	1	1	0	0	0	0	1	1	1	0	4	0	0	2	3	4	7	6	1	5	1	3	2	4	5	1	1	0	0
569	Pleasure or trail riding		3	1	1	0	0	0	0	0	0	0	0	0	0	1	1	1	1	1	1	1	0	0	0	1	3	2	2	1	2	0	0	4	1	5	6	7	3	2	3	1	2	5	4	0	1	1	1
570	Pleasure or trail riding		2	0	0	0	0	0	0	0	0	0	0	0	0	0	0	0	0	0	0	0	0	0	0																					1	1	0	1
571																	0	0	0	0	0	0	0	0	0																					0	0	0	0
572	Non-racing competition		1	0	0	0	0	0	0	0	0	0	0	0	0	1	0	0	0	0	0	0	1	1	0	0	1	0	2	3	0	1	1	6	2	1	7	4	3	5	3	2	1	5	4	1	1	0	1
573	Non-racing competition		2	1	0	0	0	0	0	0	0	0	0	0	0	1	0	1	0	0	0	1	0	0	0	1	1	1	1	0	3	1	2													0	1	1	1
576			0	0	2	0	0	0	0	0	0	1	0	1	2	1	0	0	1	0	1	1	0	0	0	0	2	1	1	2	0	0	0	3	4	1	5	7	2	6	3	5	2	1	4	1	1	1	1
577	Pleasure or trail riding		4	0	0	0	0	0	0	0	0	0	0	0	0	1	1	1	0	1	0	1	0	0	0	1	1	2	2	0	4	0	0	3	5	7	2	1	4	6	4	2	1	3	5	1	1	1	1
578	Companionship (eg. Retired horse, etc.)		0	0	2	0	0	0	0	0	2	2	2	0	2		0	0	0	0	0	0	0	0	0																					1	1	1	1
580	Companionship (eg. Retired horse, etc.)		4	0	4	0	0	0	0	0	0	0	0	0	0	1	1	1	0	1	1	1	0	0	0	0	0	0	0	0	0	0	0													1	1	0	0
581	Pleasure or trail riding		1	1	2	1	1	1	1	1	1	1	1	1	1	1	1	1	1	1	1	1	0	0	0	1	2	1	2	1	1	1	1	2	3	1	6	7	4	5	1	2	3	4	5	1	1	0	0
582			0	2	2	0	0	0	0	0	0	0	0	0	0	1	1	1	1	1	1	1	0	0	0	0	1	1	1	4	0	1	0	5	3	1	2	7	6	4	1	2	3	4	5	1	1	1	1
583			0	2	4	0	0	0	0	0	0	0	0	0	2	1	0	0	0	0	1	1	0	0	0	0	0		1	4	0	3	2	2	5	1	3	7	6	4	1	4	5	2	3	1	1	0	1
585																	0	0	0	0	0	0	0	0	0																					0	0	0	0
586	Breeding																0	0	0	0	0	0	0	0	0																					0	0	0	0
587	Work (eg. Ranching, logging, outfitting, etc.)		0	1	2	0	0	0	0	2	2	2	1	2	2	1	0	0	0	0	0	0	1	0	0	1	1	1	2	3	0	0	0	3	4	1	6	7	2	5	2	3	1	5	4	1	0	0	0
588			0	1	4	0	0	0	2	2	0	2	3	0	3		0	0	0	0	0	0	0	0	0																					0	0	0	0
589	Racing competition		1	1	1	0	0	1	1	1	1	1	1	1	1	1	0	0	1	0	0	0	0	0	0	0	1	1	1	1	0	0	0	1	6	2	7	3	4	5	1	3	4	5	2	0	1	0	0
590	Riding or school lessons		1	1	1	0	0	0	0	2	2	2	2	0	2		0	0	0	0	0	0	0	0	0																					0	0	0	0
591	Racing competition		0	0	0	0	0	0	0	0	2	0	0	2	1	1	0	0	1	0	0	1	0	0	0	0	0	0	0	0	0	0	0	3	2	1	4	7	5	6	1	4	5	3	2	0	1	0	0
592			0	3	4	0	0	0	0	3	3	3	3	3	3		0	0	0	0	0	0	0	0	0																					0	0	0	0
593																	0	0	0	0	0	0	0	0	0																					0	0	0	0
595	Pleasure or trail riding		1	0	2	0	0	0	0	0	0	1	0	0	1	1	1	1	1	1	1	1	1	1	0	0	0	0	1	0	1	0	0													0	1	1	1
597	Companionship (eg. Retired horse, etc.)		0	0	2	0	0	0	1	0	1	1	2	0	2	1	0	0	1	0	0	1	1	0	0	0	1	1	0	1	1	2	1	2	3	1	4	7	5	6	3	1	5	2	4	1	1	1	1
598	Pleasure or trail riding		0	0	2	0	0	0	0	2	1	3	3	1	2	1	0	0	0	0	0	0	1	0	0	0	0	0	0	0	0	0	0	1	4	2	3	7	6	5	1	5	4	3	2	1	0	1	1
600																	0	0	0	0	0	0	0	0	0																					0	0	0	0
603	Breeding		0		2	0	0	2	2	2	2	2	2	2	2	1	1	0	1	0	0	0	0	0	0	1	2	0	1	3	0	4	4													0	0	0	1
605	Other, please list:	I'm stuck now because I have 2 horses and they each have a different primary purpose and each have a different daily environment. I'll just pick one and answer questions for that one. This one's primary purpose is pleasure riding.	4	1	1	0	0	0	0	0	0	0	0	0	1		0	0	0	0	0	0	0	0	0																					1	1	1	1
606	Pleasure or trail riding		1	3	4	0	0	0	0	0	2	0	0	1	1	1	1	1	1	1	1	1	0	0	0	1	0	1	0	2	0	1	2	4	3	1	2	7	5	6	1	3	5	2	4	1	0	0	1
607	Riding or school lessons		0	0	2	0	0	0	0	0	2	2	1	2	2	1	0	0	0	0	1	1	0	0	0	0	1	0	1	2	0	0	0	2	5	1	6	7	3	4	2	1	4	5	3	1	0	0	0
609	Companionship (eg. Retired horse, etc.)		3	1	3	0	0	0	0	0	2	1	0	0	4	1	0	0	0	0	1	0	1	1	0	0	1	0	3	3	2	0	0	3	2	1	5	7	6	4	3	1	2	5	4	0	1	1	0
612																	0	0	0	0	0	0	0	0	0																					0	0	0	0
614	Other, please list:	Different primary purposes for each horse...cannot answer this question!	2	1	2	0	0	0	0	0	2	1	1	1	2	1	1	1	1	1	1	1	0	0	0	1	1	1	1	2	1	2	0	3	2	1	4	7	6	5	3	2	1	5	4	0	1	0	1
617	Other, please list:	training	3	1	1	0	0	0	0	1	1	1	1	1	1		0	0	0	0	0	0	0	0	0																					0	0	0	0
618	Pleasure or trail riding		2	1	1	0	0	0	0	2	0	0	0	0	2	1	1	1	1	1	1	1	0	0	0	1	3	3	1	1	1	1	1	1	6	2	7	5	4	3	1	2	4	3	5	1	1	0	0
619	Pleasure or trail riding		2	1	2	1	1	1	1	1	2	2	2	1	2	1	0	0	0	0	0	1	0	0	0	1	1	1	1	2	1	1	1	3	6	1	2	7	4	5	1	5	4	3	2	0	1	0	0
620	Pleasure or trail riding		1	1	3	0	0	0	0	0	1	0	0	1	1	1	1	1	1	0	1	1	0	0	0	1	1	1	2	2	1	1	1	4	3	2	1	7	6	5	2	5	1	4	3	1	1	1	1
622	Riding or school lessons		0	0	3	0	0	0	0	0	1	1	1	1	1	1	0	1	0	0	0	1	0	0	0	1	3	3	1	1	3	1	1	2	4	3	6	7	1	5	4	1	2	3	5	1	0	0	0
624																	0	0	0	0	0	0	0	0	0																					0	0	0	0
625	Breeding		0	1	4	0	0	0	0	0	0	1	0	0	0	1	1	1	1	1	1	1	0	0	0	0	1	0	1	2	0	1	1	2	6	1	3	7	5	4	1	3	2	4	5	1	1	0	1
626	Riding or school lessons			0	0	0	0	0	0	0	0	0	0	0	0		0	0	0	0	0	0	0	0	0																					0	0	0	0
627	Non-racing competition		2	2	2	0	0	0	0	0	0	1	1	0	1	1	1	0	0	0	1	1	0	0	0	1	1	0	1	2	2	0	0													1	1	0	0
629	Other, please list:	Competition, breeding, sale	0	1	2	0	0	0	0	0	0	0	0	0	1	1	1	1	1	1	1	1	0	0	0	0	0	0	0	0	0	0	0	5	1	7	3	2	4	6	2	1	4	5	3	1	1	1	1
630	Non-racing competition																0	0	0	0	0	0	0	0	0																					0	0	0	0
631																	0	0	0	0	0	0	0	0	0																					0	0	0	0
632	Non-racing competition		3	1	1	1	1	1	1	1	1	1	1	1	1		0	0	0	0	0	0	0	0	0																					0	0	0	0
633			0	1	1	0	0	0	0	0	1	2	0	0	0		0	0	0	0	0	0	0	0	0																					0	0	0	0
634	Riding or school lessons		3	1	2	0	0	0	0	0		0	0	0	2		0	0	0	0	0	0	0	0	0																					0	0	0	0
635	Pleasure or trail riding		4	0	0	0	0	0	0	0	0	0	0	0	0	1	1	1	1	1	1	1	0	0	0	1	1	0	1	2	1	1	1	6	5	4	3	1	2	7	2	4	5	3	1	0	1	0	1
636	Non-racing competition		3	1	4	0	0	0	0	0	0	0	0	0	2	1	1	1	1	1	1	1	0	0	0	0	0	0	0	0	0	0	0	3	6	1	4	7	2	5	1	4	2	3	5	1	0	1	1
637			1	1	2	0	0	0	0	1	2	2	2	1	1	1	0	0	0	0	0	0	1	0	0	1	2	1	2	2	2	1	1	2	3	1	4	7	6	5	1	3	2	5	4	1	1	1	1
638	Pleasure or trail riding		3	0	1	0	0	0	1	1	1	1	1	1	1	1	0	0	0	0	0	1	0	0	0	0	0	1	1	0	0	0	0	3	4	2	1	6	7	5	1	4	5	3	2	0	1	0	1
639																	0	0	0	0	0	0	0	0	0																					0	0	0	0
640	Pleasure or trail riding		2	1	2	0	0	0	0	0	0	0	0	0	0	1	0	0	1	0	1	1	0	0	0	0	2	1	2	1	2	1	1	6	5	1	3	2	7	4	1	4	5	3	2	1	1	1	1
641			0	3	1	0	0	0	0	1	2	1	0	0	0	1	1	0	0	1	0	1	0	0	0	0	0	0	0	0	4	1	1	2	6	1	4	7	5	3	1	4	5	2	3	1	1	0	1
642	Other, please list:	Raise & train our home bred horses to train and keep or sell	1	2	3	0	0	0	0	1	2	1	1	1	1	1	0	0	0	0	0	0	1	0	0	0	3	1	1	3	0	0	0	2	5	4	6	1	3	7	3	2	1	4	5	1	1	1	1
643																	0	0	0	0	0	0	0	0	0																					0	0	0	0
645	Other, please list:	Driving	1	2	4	0	0	0	0	0	2	2	1	2	2	1	1	1	1	1	1	1	1	0	0	3	1	1	1	4	0	3	3	2	4	1	5	6	7	3	1	2	3	5	4	1	1	0	1
646			4	1	2	0	0	0	0	1	1	0	2	0	0	1	1	1	1	1	0	1	0	0	0	1	2	1	3	1	2	2	2	2	4	3	5	7	6	1	2	5	1	3	4	1	1	0	1
647	Horse therapy or rehabilitation		1	1	1	0	0	0	0	0	0	0	2	1	2	1	0	0	0	0	0	1	0	1	0	1	2	0	0	0	1	1	1	2	4	1	3	6	5	7	4	1	3	2	5	0	1	0	0
648	Pleasure or trail riding		0			0	0	0	1	1	2	3	2	2	3	1	0	0	1	0	0	0	1	1	0	3	1	0	1	4	0	4	2	2	3	1	6	7	5	4	1	4	5	3	2	1	1	1	1
650	Riding or school lessons		2	1	1	0	0	0	0	0	0	1	1	0	1	1	1	1	1	1	1	1	0	0	0	0	1	0	2	1	1	1	1	3	4	1	5	7	6	2	1	5	4	2	3	1	1	1	1
651	Pleasure or trail riding		2	0	0	0	0	0	0	0	0	0	0	0	0	1	1	1	1	1	1	1	0	0	0	0	1	0	1	1	2	1	1	5	2	1	4	7	3	6	1	3	5	2	4	1	1	1	1
652	Non-racing competition		2	1	1	1	1		1	1	1	3	1	1	3	1	0	0	0	0	1	1	0	0	0	1	1	0	0	1	1	0	0	1	2	5	7	6	3	4	3	5	4	1	2	0	1	0	1
653	Other, please list:	I have one retired horse, one competition horse and one previously injured pleasure horse	1	0	0	0	0	0	0	0	0	0	0	0	0	1	0	0	0	1	1	1	1	0	0	0	1	1	3	1	1	0	0	4	6	3	2	7	1	5	3	2	1	5	4	1	1	0	1
655	Non-racing competition		3	0	1	0	0	0	0	0	0	0	0	0	0	1	0	0	0	0	0	0	1	1	0	1	1	1	1	2	2	1	1													1	1	1	1
656	Riding or school lessons		1	2	1	0	0	0	0	0	2	0	0	2	2	1	0	0	0	0	0	0	1	0	0	0	0	0	2	2	0	0	0	7	3	1	2	6	5	4	1	3	4	5	2	1	1	0	1
657	Work (eg. Ranching, logging, outfitting, etc.)		1	1	3	0	0	0	0	0	0	0	0	0	2	1	0	0	0	0	0	1	0	0	0	0	0	0	0	0	0	0	0	2	3	4	7	6	5	1	1	4	5	3	2	1	1	1	1
658	Pleasure or trail riding		2	1	1	0	0	0	0	0	0	3	2	0	1	1	1	1	0	1	0	1	0	0	0	0	1	0	0	0	2	0	0	5	6	2	3	7	1	4	1	2	4	5	3	1	0	1	0
659	Pleasure or trail riding		1	1	0	0	0	0	0	1	1	1	1	0	2	1	1	1	1	1	1	1	0	0	0	2	1	0	1	2	1	3	1	2	3	1	5	7	4	6	1	4	2	3	5	1	1	1	1
660	Pleasure or trail riding		2	0	0	0	0	0	0	0	0	0	2	0	0	1	1	0	1	1	0	1	0	0	0	0	0	0	3	0	2	0	0	3	7	5	2	4	1	6	5	2	1	3	4	0	1	0	0
663																	0	0	0	0	0	0	0	0	0																					0	0	0	0
664	Non-racing competition		2	2	3	0	0	0	0	0	0	2	2	2	2	1	1	1	1	1	1	1	0	0	0	0	0	0	0	0	0	0	0													1	1	1	1
665	Pleasure or trail riding		3	1	2	0	0	0	1	1	1	2	1	2	2	1	1	1	1	1	1	1	0	0	0	1	2	1	1	0	3	1	1	2	6	1	4	7	5	3	2	4	5	3	1	1	1	1	1
666			0	0		0	0	0	0	0	0	0	0	0	0	1	1	1	0	1	1	1	0	0	0	0	0	0	0	0		0	0													0	1	1	1
667	Pleasure or trail riding		0	0	1	0	0	0	0	0	0	0	0	0	2	1	1	1	1	1	1	1	0	0	0	0	2		1	0	0	0	0	2	6	3	4	7	1	5	1	3	4	2	5	1	1	1	1
668	Work (eg. Ranching, logging, outfitting, etc.)		0	0	1	0	0	0	1	2	2	0	0	2	1	1	1	0	0	1	1	0	0	0	0	1	3	1	3	3	0	0	0	1	3	2	6	5	7	4	1	2	4	5	3	0	1	1	1
669	Pleasure or trail riding		2	0	0	0	0	0	0	0	0	0	0	0	1	1	0	0	0	0	0	1	0	0	0	0	2	0	2	0	2	0	0													0	0	0	1
670	Pleasure or trail riding		0	0	0	0	0	0	0	0	0	0	0	0	0	1	0	0	0	0	0	0	0	0	1	1	1	0	1	0	3	0	0	6	5	3	1	4	7	2	2	3	5	4	1	0	1	1	1
671	Riding or school lessons		3	1	2	0	0	0	0	0	1	2	1	1	1	1	1	1	1	1	1	1	0	0	0	0	0	0	2	0	4	0	0	7	6	3	1	4	2	5	2	1	3	5	4	1	1	0	0
672	Pleasure or trail riding		4	0	1	0	0	0	0	0	0	0	0	0	2	1	0	0	0	0	0	0	1	0	0	0	0	0	2	0	4	0	0	7	5	3	2	6	1	4	2	3	1	5	4	0	1	1	1
673	Pleasure or trail riding		1	1	2	0	0	0	0	0	0	0	0	0	1		0	0	0	0	0	0	0	0	0																					0	0	0	0
674	Companionship (eg. Retired horse, etc.)																0	0	0	0	0	0	0	0	0																					0	0	0	0
675			2	1	1	0	0	0	0	0	1	1	1	0	0	1	1	1	1	1	1	1	1	0	1	0	0	0	0	0	0	0	0	3	5	1	2	7	6	4	1	4	3	2	5	1	1	1	1
676																	0	0	0	0	0	0	0	0	0																					0	0	0	0
677	Work (eg. Ranching, logging, outfitting, etc.)		1	1	4	0	0	0	0	0	0	0	0	0	0		0	0	0	0	0	0	0	0	0																					0	0	0	0
678	Riding or school lessons		0	0	4	0		0	0	0	0	0	0	0	0	1	1	1	0	1	1	1	0	0	0	0	3	0	0	0	0	0	0	1	2	3		5		4	2	1	3		4	0	1	0	0
679	Pleasure or trail riding		1	1	3	0	0	0	3	1	2	1	1	1	1	1	1	1	1	1	1	1	0	0	0	0	2	0	1	2	1	0	0	3	2	1	4	7	6	5	1	3	2	4		1	1	1	1
683	Pleasure or trail riding		1	1	1	0	0	0	0	0	0	0	2	0	0	1	1	1	1	1	1	1	0	0	0	1	1	1	2	0	0	0	0	3	5	1	4	7	2	6	5	3	4	2	1	1	1	1	1
684			0	0	1	0	0	0	0	1	1	0	0	1	1	1	1	1	1	1	1	1	0	0	0	0	1	2	2	2	2	1	1													1	1	1	1
686	Companionship (eg. Retired horse, etc.)		2	0	0	0	0	0	0	0	0	0	0	0	0	1	1	1	1	1	1	1	0	0	0	0	0	0	0	0	0	0	0	1	6	3	5	7	2	4	1	5	4	3	2	1	1	1	1
687	Pleasure or trail riding		0	1	4	0	0	0	0	1	1	4	3	1	1	1	1	1	1	1	1	1	0	0	0	1	2	1	2	1	1	1	1													1	1	0	1
688	Riding or school lessons		0	1	0	0	0	0	0	0	1	1	0	1	1	1	0	0	1	0	0	1	0	1	0	0	0	0	1	1	3	1	0	7	6	4	5	2	3	1	1	3	5	4	2	0	1	1	1
689	Non-racing competition		1	0	0	0	0	0	0	0	0	0	0	0	0	1	1	1	0	1	0	1	0	0	0	1	1	1	1	0	1	1	1	4	5	2	1	7	6	3	2	5	1	4	3	1	1	0	1
690	Riding or school lessons		1	0	1	0	0	0	0	0		0	0	0	0	1	0	0	0	0	0	1	0	0	0	2	1	1	1	2	2	2	2	1												0	1	1	1
691																	0	0	0	0	0	0	0	0	0																					0	0	0	0
694	Pleasure or trail riding		3	0	0	0	0	0	0	0	0	0	0	0	0	1	1	1	1	1	1	1	0	0	0	1	1	0	1	3	1	1	1	7	2	3	6	4	5	1	1	3	2	4	5	1	1	1	1
697	Pleasure or trail riding		2	1	3	0	0	0	0	0	0	0	0	0	1	1	1	1	0	0	0	0	0	0	0	1	2	1	1	0	3	2	1	5	3	2	4	7	6	1	1	4	5	2	3	1	1	1	1
698	Other, please list:	showing in reining	0	0	0	0	0	0	0	0	0	0	0	0	0		0	0	0	0	0	0	0	0	0																					1	1	1	1
700																	0	0	0	0	0	0	0	0	0																					0	0	0	0
701	Pleasure or trail riding		3	0	0	0	0	0	0	0	0	0	0	0	0	1	0	1	0	0	0	1	0	0	0	0	3	0	4	0	4	0	0	2	3	1	7	5	4	6	4	2	1	3	5	1	1	1	1
702	Work (eg. Ranching, logging, outfitting, etc.)		1	1	0	0	0	0	0	0	0	0	0	0	0	1	1	1	1	1	1	1	0	0	0	1	1	1	1	0	0	0	0	5	3	2	4	7	1	6	2	5	4	3	1	0	0	0	0
704																	0	0	0	0	0	0	0	0	0																					0	0	0	0
705	Pleasure or trail riding		1	1	0	0	0	0	0	3	2	2	1	1	2	1	1	1	1	1	1	1	0	0	0	2	2	1	2	0	2	2	2	3	5	4	2	7	1	6	2	4	3	5	1	1	1	1	1
706	Other, please list:	Reined cow horse competition	3	0	1	0	0	0	0	1	1	0	1	1	2	1	0	0	0	0	0	1	0	0	0	1	1	1	1	2				2	4	6	3	7	5	1	1	4	5	3	2	0	1	1	1
707	Other, please list:	1 trail riding,2 breeding,4 non racing competition, 2 retirees	1	1	4	1	1	1	1	1	1	1	1	1	2	1	0	0	1	0	0	0	0	0	0	1	0	0	1	3	1	2	2	3	4	1	2	7	6	5	1	3	4	5	2	0	1	0	0
708	Other, please list:	a training partner for competition															0	0	0	0	0	0	0	0	0																					0	0	0	0
709																	0	0	0	0	0	0	0	0	0																					0	0	0	0
711			1	1	3	4	4	4	4	2	2	4	4	4	4	1	1	1	1	1	1	1	0	1	0	2	2	2	2	2	2	2	2	4	1	2	7	6	5	3	3	2	5	1	4	0	1	0	1
713	Pleasure or trail riding		1	1	2	1	1	1	1	1	1	1	1	1	1	1	1	1	1	1	1	1	0	0	0	1	2	2	2	1	3	1	1	4	2	1	7	5	3	6	1	5	4	2	3	1	1	1	1
714	Non-racing competition																0	0	0	0	0	0	0	0	0																					0	0	0	0
715			4	0	0	0	0	0	0	0	0	0	0	0	0	1	1	1	1	1	1	1	0	0	0	0	0	0	0	0	3	0	0	5	4	2	6	1	7	3	1	3	4	5	2	1	1	0	1
716	Pleasure or trail riding		1	1	2	0	0	1	1	2	2	2	0	2	2	1	1	1	1	1	1	1	0	0	0	0	0	0	0	2	0	0	1	2	3	1	4	7	6	5	1	4	3	2	5	1	1	1	1
717	Pleasure or trail riding		0	0	0	1	0	0	0	0	0	0	0	0	0	1	0	1	1	1	0	1	0	0	0	0	0	0	0	0	0	0	0								4	2	1	3	5	1	1	1	1
718	Riding or school lessons		1	0	0	0	0	0	0	0	0	0	0	0	0		0	0	0	0	0	0	0	0	0																					0	0	0	0
719	Pleasure or trail riding		2	0	0	0	0	0	0	0	0	0	0	0	0	1	1	1	1	1	1	1	0	0	0	1	1	0	1	0	3	0	0	3	5	2	4	7	1	6	1	2	3	4	5	1	1	1	1
720	Other, please list:	He is rescued from racetrack, from murder.	4	0	0	0	0	0	0	0	0	0	2	0	0		0	0	0	0	0	0	0	0	0																					0	0	0	0
721																	0	0	0	0	0	0	0	0	0																					0	0	0	0
723	Riding or school lessons		2	1	0	0	0	0	0	0	0	0	0	0	0		0	0	0	0	0	0	0	0	0																					0	0	0	0
724	Companionship (eg. Retired horse, etc.)		4	0	0	0	0	0	0	0	0	0	0	0	0	1	1	1	1	1	1	1	0	0	0	0	1	0	0	1	4	0	1	3	6	1	4	7	5	2	1	5	3	4	2	1	1	1	1
725	Non-racing competition		0	1	1	0	0	0	0	1	3	3	1	0	3	1	1	1	1	1	0	1	0	0	0	0	1	1	0	3	0	3	2	3	5	2	1	7	6	4	2	4	5	3	1	0	1	0	0
726	Companionship (eg. Retired horse, etc.)		3	0	0	0	0	0	0	0	0	0	0	0	0	1	1	1	1	1	1	1	0	0	0	0	1	0	0	1	1	0	0	2	3	1	5	6	4	7	3	5	1	2	4	1	1	1	1
727	Pleasure or trail riding		4	0	0	0	0	0	0	0	0	2	0	0	0	1	1	1	1	1	1	1	0	0	0	0	2	1	2	0	4	0	0	4	7	2	3	6	1	5	4	2	1	3	5	0	0	1	1
728	Non-racing competition		0	0	0	0	0	0	0	0	0	1	0	0	1	1	1	1	1	1	1	1	1	1	0	0	0	0	0	0	4	0	0													0	1	1	1
729	Pleasure or trail riding		1	0	1	0	0	0	0	0	0	2	2	0	2	1	1	1	1	1	1	1	0	0	0	0	1	1	0	0	0	0	0	2	3	4	6	7	1	5	1	4	5	2	3	1	1	0	1
731	Riding or school lessons		3	0	1	0	0	0	0	0	0	2	0	0	0	1	1	1	1	1	1	1	0	0	0	0	4	1	3	0	0	0	0	2	5	3	4	6	1	7	2	3	1	4	5	0	1	0	1
732	Riding or school lessons		2	1	1	1	0	0	0	0	1	1	0	1	1	1	0	0	1	1	0	1	0	0	0	1	1	0	1	1	2	2	1	1		2		5	4	3	2	4	5	3	1	1	1	0	1
733																	0	0	0	0	0	0	0	0	0																					0	0	0	0
734	Pleasure or trail riding		3	0	0	0	0	0	0	0	0	0	0	0	1		0	0	0	0	0	0	0	0	0																					0	0	0	0
735	Riding or school lessons		1	1	3	0	0	0	0	1	1	2	2	1	2	1	1	1	1	1	1	1	0	0	0	0	1	0	1	1	2	1	1	3	4	2	5	6	1	7	2	4	5	1	3	1	1	1	1
736	Riding or school lessons																0	0	0	0	0	0	0	0	0																					0	0	0	0
737	Non-racing competition																0	0	0	0	0	0	0	0	0																					0	0	0	0
738	Breeding		0	0	0	0	0	0	0	0	0	0		0	2	1	1	1	1	1	1	1	0	0	0	0	2	1	1	2	2	2	1	6	3	4	7	2	1	5	1	4	5	3	2	1	1	1	1
739	Non-racing competition		1	2	2	0	0	0	0	0	0	0	0	0	0	1	0	0	1	1	0	1	0	0	0	0	1	1	0	2	1	1	1	2	5	1	6	7	4	3	1	4	5	3	2	1	1	1	1
740	Non-racing competition		0	2	2	0	0	0	1	1	3	3	3	3	3	1	1	1	1	1	1	1	0	0	0	0	0	0	1	2	1	1	1	5	2	1	6	7	3	4	2	4	5	1	3	0	0	1	1
741	Pleasure or trail riding		0	0	0	0	0	0	0	0	0	0	0	0	0		0	0	0	0	0	0	0	0	0																					0	0	0	0
743	Companionship (eg. Retired horse, etc.)		0	0	0	0	0	0	0	0	2	2	2	0	2	1	1	1	1	1	1	1	0	0	0	0	2	0	0	0	0	0	0	1	6	3	4	7	5	2	2	3	4	1	5	1	1	1	1
744	Riding or school lessons		2	1	0	0	0	0	0	0	0	0	0	0	0	1	0	0	1	0	0	1	0	0	0	0	0	0	0	3	1	0	0	1	2	4	7	3	6	5	3	2	1	4	5	1	1	0	1
745	Pleasure or trail riding		0	0	0	0	0	0	0	0	0	0	0	0	0	1	0	0	0	0	0	0	1	1	0	0	0	0	0	4	0	0	0	5	2	1	3	7	4	6	1	3	4	2	5	0	1	0	0
746	Pleasure or trail riding		3	0	0	0	0	0	0	0	2	0	0	0	2	1	1	1	1	1	1	1	0	0	0	0	0	0	1	2	0	0	0	7	4	1	3	2	5	6	1	4	5	2	3	0	1	1	1
748	Pleasure or trail riding		1	3	4	0	0	1	1	3	3	3	2	2	4	1	1	1	1	1	1	1	1	0	0	1	2	1	2	4	0	3	3	2	3	1	5	7	6	4	1	4	5	3	2	1	1	1	1
749	Non-racing competition		1	0	1	0	0	0	0	0	2	1	0	0	0	1	1	0	1	1	0	1	0	0	0	1	1	0	1	2	2	1	1	2	3	1	6	7	4	5						0	0	0	0
750	Other, please list:	western showing	0	0	0	0	0	0	0	0	0	0	0	0	0	1	1	1	1	1	1	1	0	0	0	0	1	1	4	2	2	0	0	2	4	3	5	7	1	6	1	4	3	5	2	1	1	0	1
752	Riding or school lessons		1	1	2	0	0	0	0	0	1	1	1	0	1	1	1	0	1	1	0	1	0	0	0	0	1	0	1	2	1	1	0	5	6	1	2	7	3	4	1	4	3	2	5	0	1	1	0
753	Pleasure or trail riding		4	1	1	1	1	1	1	1	1	1	1	1	0	1	0	1	0	0	0	1	0	0	0	1	3	2	2	0	3	0	0	4	3	5	6	2	1	7	3	2	1	4	5	1	1	0	1
754	Riding or school lessons		4	0	1	0	0	0	0	0	0	0	0	0	0	1	1	0	0	1	0	1	0	0	0	0	1	0	0	0	2	3	3													0	0	1	1
757	Pleasure or trail riding		1	1	3	1	1	1	1	1	1	1	1	1	1	1	1	1	1	0	0	1	0	0	0	0	1	0	1	2	2	3	3	2	3	1	6	4	5	7	1	4	5	3	2	0	1	1	1
759	Non-racing competition		0	2	1	0	0	0	0	0	0	0	0	0	0	1	0	0	0	0	0	1	0	0	0	0	1	1	2	3	0	2	1	2	3	1	6	7	4	5	1	3	5	4	2	0	1	0	0
760																	0	0	0	0	0	0	0	0	0																					0	0	0	0
761	Pleasure or trail riding		0	4	1	0	0	0	0	0	0	0	0	0	0	1	0	0	0	0	0	0	1	0	0	0	0	0	1	1	0	0	0	4	3	1	2	7	6	5	3	2	1	4	5	1	1	1	1
762	Non-racing competition		0	4	4	0	0	0	0	2	2	2	0	0	4	1	0	0	1	0	0	0	0	0	0	0	1	1	1	4	0	3	2	5	3	1	6	7	4	2	1	4	5	2	3	0	1	0	0
763	Pleasure or trail riding		4	0	1	0	0	1	0	0	0	0	1	1	0	1	0	0	0	0	0	1	0	0	0	0	0	0	1	0	4	0	0	3	7	4	2	5	1	6	1	4	5	3	2	0	0	0	1
766	Pleasure or trail riding		1	2	3	0	0	0	0	0	0	0	0	0	0	1	1	1	0	1	0	1	0	0	0	0	2	2	2	2	1	0	0	5	3	2	1	7	4	6	2	5	4	3	1	1	1	1	1
767	Pleasure or trail riding		0	0	1	0	0	0	0	3	1	0	1	0	0	1	1	1	1	1	1	1	0	0	0	0	0	0	0	1	3	0	0	6	4	3	1	7	2	5	1	3	4	5	2	1	1	1	1
768	Non-racing competition		1	1	2	0	0	0	0	2	2	3	3	2	3	1	0	0	1	0	1	1	0	1	0	2	1	0	3	2	2	3	1	3	7	1	6	2	4	5	1	4	5	3	2	0	1	0	0
769	Breeding		1	1	3	1	1	1	1	2	2	3	3	2	3	1	0	0	1	0	0	1	0	0	0	1	1	2	1	2	1	1	1						1							0	1	1	1
772	Pleasure or trail riding																0	0	0	0	0	0	0	0	0																					0	0	0	0
773	Pleasure or trail riding		3	0	0	0	0	0	0	0	0	0	0	0	0	1	0	0	0	0	0	1	0	0	0	0	0	0	0	0	2	0	0	1	6	3	2	7	4	5	3	4	5	2	1	1	1	1	1
774	Pleasure or trail riding		3	0	1	0	0	0	0	0	0	0	0	0	0	1	1	1	0	0	0	1	0	0	0	1	1	1	1	0	4	0	0													1	1	1	1
775			2	0	0	0	0	0	0	0	0	0	0	0	0	1	0	1	0	0	0	1	0	0	0	0	2	1	1	0	0	0		6	3	1	5	4	7	2	1	3	4	5	2	0	1	0	1
777	Pleasure or trail riding		1	1	2	0	0	2	1	1	2	2	2	2	2	1	1	1	1	1	1	1	0	0	0	1	1	1	1	1	2	1	1	6	3	1	2	7	4	5	1	3	5	4	2	1	1	1	1
778	Pleasure or trail riding		2	0	0	0	0	0	0	0	0	0	0	0	1	1	0	0	0	0	0	1	1	1	0	0	1	0	1	0	0	0	0	2	5	1	6	7	4	3	3	5	1	2	4	1	1	0	1
779	Other, please list:	Driving recreation and competition															0	0	0	0	0	0	0	0	0																					0	0	0	0
780	Other, please list:	Is to be a horse. we ride, we work at liberty, we walk the fields side by side, depends on the day	4	0	0	0	0	0	0	0	0	0	0	0	0	1	1	1	1	1	1	1	0	0	0	0	2	1	3	0	4	0	0	5	6	2	4	3	1	7	4	2	1	3	5	1	1	0	0
781	Non-racing competition		1	0	0	0	0	0	0	0	0	0	0	0	0	1	0	0	0	0	0	1	0	0	0	0	0	0	0	0	0	0	0	6	5	2	4	1	3	7	4	2	1	3	5	1	1	1	1
783	Pleasure or trail riding		2	0	0	0	0	0	0	0	0	0	0	0	0	1	1	1	0	1	0	1	0	0	0	1	0	0	0	1	2	1	1	4	5	2	1	6	3	7	1	5	4	3	2	1	1	1	0
784	Non-racing competition		1	1	1	0	0	0	0	0	0	2	0	0	2	1	1	1	0	1	0	1	0	0	0	0	1	1	1	0	2	1	1	5	4	1	3	7	2	6	3	5	4	1	2	1	0	1	1
785			3	0	1	0	0	0	0	1	1	1	2	1	2	1	1	1	1	1	1	1	0	0	0	0	1	0	1	0	4	0	0	4	6	3	2	7	1	5	3	4	1	2	5	1	1	1	1
786	Pleasure or trail riding		1	0	0	0	0	0	0	0	0	0	0	0	0		0	0	0	0	0	0	0	0	0																					0	0	0	0
787	Companionship (eg. Retired horse, etc.)		1	1	2	0	0	0	0	1	1	3	0	1	3	1	1	1	1	0	0	1	0	0	0	0	1	0	1	1	0	1	0	4	6	2	5	7	1	3	4	2	1	3	5	0	1	1	1
788	Pleasure or trail riding		1	1	3	0	0	0	0	0	0	1	1	1	1	1	0	0	0	1	0	1	0	0	0	0	0	1	0	0		0	0	6	5	1	3	4	2	7	1	4	5	3	2	0	1	0	0
789																	0	0	0	0	0	0	0	0	0																					0	0	0	0
790	Pleasure or trail riding		3	1	3	0	0	0	1	1	2	2	2	2	2	1	0	0	1	0	0	1	0	0	0	1	2	2	2	1	1	1	0	4	6	3	5	1	2	7	2	5	3	1	4	1	1	0	1
791	Other, please list:	retirement	3	1	2	0	0	0	0	0	0	0	0	0	2		0	0	0	0	0	0	0	0	0																					0	0	0	0
792	Riding or school lessons		1	1	2	0	0	0	1	1	1	2	1	1	2	1	1	1	1	1	1	1	0	0	0	1	1	1	1	2	2	1	1	1	5	2	3	7	6	4	1	2	3	5	4	1	1	0	1
793	Riding or school lessons		1	0	1	0	0	0	0	0	0	1	0	1	1	1	1	0	1	1	0	1	0	0	0	0	1	1	0	0	0	1	1	2	6	5	3	7	1	4	1	4	5	2	3	0	1	1	1
796	Pleasure or trail riding		2	2	3	1	0	0	0	0	2	1	0	0	1	1	1	1	1	1	1	1	0	0	0	2	3	0	1	4	2	1	1	2	7	1	6	5	3	4	3	4	1	2	5	1	1	0	1
797	Companionship (eg. Retired horse, etc.)		3	1	0	0	0	0	0	0	0	0	0	0	0	1	1	1	1	1	1	1	0	0	0	0	2	0	0	0	3	0	0	2	4	1	3	5	6	7	5	2	1	3	4	1	1	1	1
798	Pleasure or trail riding		3	1	1	0	0	0	0	0	0	0	0	0	0	1	1	1	1	1	1	1	0	0	0	2	2	2	2	2	2	2	2	3	4	1	7	6	2	5	1	3	4	2	5	1	1	1	1
799	Non-racing competition		2	0	0	0	0	1	0	0	1	3	2	1	2	1	1	1	1	1	1	1	0	0	0	1	1	0	2	0	3	1	0													1	1	1	1
802	Non-racing competition		1	0	0	0	0	1	1	0	1	1	1	0	0	1	0	0	0	0	0	1	0	1	0	0	1	0	0	0	1	0	0													0	1	0	1
803	Pleasure or trail riding		1	0	1	0	0	0	0	0	0	0	0	0	1	1	0	0	0	0	0	1	0	0	0	0	1	0	1	2	2	0	0	2	3	1	4	7	6	5	1	5	4	2	3	1	1	1	1
805	Other, please list:	compettition and pleasure	1	0	0	0	0	0	0	0	0	0	0	0	0	1	0	0	0	0	0	1	0	0	0	1	1	1	1	0	2	1	0	2	6	1	5	4	3	7	1	3	4	5	2	1	1	0	1
806	Pleasure or trail riding		2	0	0	0	0	0	0	0	0	0	0	0	0	1	0	1	0	1	0	1	0	0	0	0	2	1	0	0	4	0	0	3	5	1	2	7	4	6	1	5	2	3	4	1	1	0	1
809																	0	0	0	0	0	0	0	0	0																					0	0	0	0
812			1	4	4	0	0	0	0	0	0	2	2	1	1	1	1	1	0	1	0	1	0	0	0	0	0	0	0	0	4	1	1	4	2	1	3	7	6	5	3	4	2	1	5	1	1	0	1
813			1	1	2	1	1	1	1	1	1	1	1	1	1		0	0	0	0	0	0	0	0	0																					0	0	0	0
814	Other, please list:	objective is to show as an amateur owner dressage rider	2	0	2	0	0	0	0	0	2	0	0	2	2	1	1	1	0	1	1	1	0	0	0	1	2	2	2	0	4	0	0	2	6	1	3	5	4	7	1	2	5	3	4	1	1	1	1
815			1	0	3	0	0	0	0	0	1	1	0	0	2	1	1	1	1	1	1	1	0	0	0	0	1	1	1	0	1	1	1	3	6	5	1	7	2	4	2	4	5	1	3	1	1	0	0
817			4	1	0	0	0	0		0	0	0	1	0	0	1	1	1	1	1	1	1	1	0	0	0	1	0	0	0	4	0	0	4	7	3	2	5	1	6	4	1	2	5	3	0	1	0	1
818			1	1	1	0	0	0	0	0	0	0	0	0	0		0	0	0	0	0	0	0	0	0																					0	0	0	0
819	Pleasure or trail riding		3	0	3	0	0	0	0	0	0	0	0	0	2		0	0	0	0	0	0	0	0	0																					0	0	0	0
820			3	0	1	0	0	1	0	1	0	1	1	0	0	1	1	1	1	1	1	1	0	0	0	0	1	0	1	1	3	0	0	5	6	1	2	4	3	7	3	2	1	4	5	1	1	1	1
821	Pleasure or trail riding		2	0	0	0	0	0	0	0	0	0	0	0	0	1	1	0	1	1	0	1	0	0	0	0	0	0	0	0	0	0	0	7	6	2	4	3	1	5	4	2	1	5	3	1	1	1	1
822	Pleasure or trail riding		3	1	0	0	0	0	0	0	0	0	0	0	0	1	0	0	0	0	0	1	0	0	0	2	3	3	3	0	4	2	0	2	5	6	3	7	1	4	1	4	5	3	2	1	1	0	1
823	Pleasure or trail riding		0	0	1	0	0	0	0	1	1	1	1	1	1	0	0	0	0	0	0	0	0	0	0																					1	1	1	1
825	Pleasure or trail riding		1	2	1	1	1	1	1	2	2	2	2	2	2	1	0	1	1	1	0	1	0	0	0	0	1	1	1	2	1	1	1	2	4	1	3	7	6	5	2	4	5	1	3	0	1	0	1
826	Non-racing competition		3	1	2	0	0	0	0	1	1	1	1	1	3	1	1	1	1	1	1	1	0	0	0	2	1	1	2	3	3	0	0	2	4	1	6	5	3	7	3	1	2	5	4	1	1	1	1
827	Pleasure or trail riding			0	0	0	0	0	0	0	0	0	0	0	0		0	0	0	0	0	0	0	0	0																					0	0	0	0
828	Pleasure or trail riding		3	1	1	1	1	1	1	1	2	1	1	1	2	1	0	0	0	0	1	1	0	0	0	1	1	1	1	1	1	1	0	3	4	2	6	7	1	5	1	3	4	5	2	0	1	1	1
830	Companionship (eg. Retired horse, etc.)		1	0	1	0	0	0	0	0	0	0	0	0	0	1	0	1	0	1	0	1	0	0	0	0	0	0	2	1	2	1	1	2	4	1	6	7	5	3	1	3	2	4	5	1	1	1	0
831			4	0	0	0	0	0	0	0	0	0	0	0	0	1	1	1	1	1	1	1	0	0	0	0	0	0	0	0	4	0	0	5	4	3	2	7	1	6	1	3	2	4	5	1	1	1	1
833	Pleasure or trail riding		2	2	4	0	0	0	1	4	4	4	4	4	4	1	1	1	1	1	1	1	0	0	0	0	0	0	1	0	0	2	1	3	2	1	4	7	6	5	1	3	5	2	4	1	1	1	1
834	Pleasure or trail riding		1	0	2	0	0	0	0	1	2	3	3	2	3	1	1	1	1	1	1	1	0	0	0	0	0	0	0	3	0	2	2	5	3	1	2	6	4	7	3	1	5	4	2	0	1	1	1
835	Riding or school lessons		1	3	3	0	0	0	0	0	2	2	1	3	3	1	1	1	1	1	1	1	0	0	0	0	2	0	1	3	2	1	1													1	1	0	0
837	Riding or school lessons		1	0	1	0	0	0	0	0	0	0	0	0	0	1	1	1	1	1	1	1	0	0	0	0	1	0	3	0	4	0	0	7	6	1	5	3	2	4	1	4	5	2	3	0	1	0	0
839	Non-racing competition		3	1	2	0	0	0	0	1	1	3	2	0	1	1	1	1	1	1	1	1	0	0	0	0	0	1	1	2	1	0	0	6	4	5	3	1	2	7	4	2	1	5	3	0	1	1	0
840	Pleasure or trail riding		1	0	0	0	0	0	0	2	2	1	1	0	2		0	0	0	0	0	0	0	0	0																					0	0	0	0
841	Pleasure or trail riding		0	0	1	0	0	0	0	0	0	0	0	1	3	1	1	1	1	1	1	1	0	0	0	1	1	0	1	1	1	2	1	4	5	1	2	7	6	3	2	3	4	5	1	1	1	0	1
842	Pleasure or trail riding		0	1	4	0	0	0	2	2	3	3	1	2	4	1	1	1	1	1	1	1	0	0	0	1	2	1	1	3	1	2	2	1	4	2	5	6	3	7	1	5	4	2	3	1	1	0	1
843			3	1	1	0	0	0	0	0	0	0	0	0	0	0	0	0	0	0	0	0	0	0	0																					1	1	1	1
844	Pleasure or trail riding		4	1	0	0	0	0	0	0	0	0	0	0	0	1	1	1	1	1	1	1	0	0	0	0	1	0	2	0	1	0	0	2	6	3	4	5	1	7	4	2	1	3	5	1	1	1	1
845	Breeding		0	3	4	1	0	1	1	1	3	1	1	1	3	0	0	0	0	0	0	0	0	0	0																					1	1	1	1
849	Non-racing competition		2	1	2	0	0	0	0	0	0	1	0	1	2	1	1	1	1	1	1	1	0	0	0	0	1	0	1	1	4	2	1	2	5	1	4	7	3	6	2	4	5	3	1	1	1	0	0
850	Pleasure or trail riding		0	0	0	0	0	0	0	0	0	0	0	0	0	1	0	0	0	0	0	1	0	0	0	0	1	1	1	3	0	1	1	3	2	1	5	6	7	4	1	3	4	2	5	0	1	1	1
851																	0	0	0	0	0	0	0	0	0																					0	0	0	0
852	Riding or school lessons		4	0	0	0	0	0	0	0	0	0	0	0	0	1	1	1	0	1	0	1	0	0	0	0	0	0	0	0	2	2	2	1	6	2	4	7	5	3	1	4	5	3	2	1	1	1	1
853	Riding or school lessons		4	1	1	0	0	0	0	0	0	0	0	0	0	1	0	1	0	1	0	1	0	0	0	0	0	0	1	0	4	0	0	1	4	2	3	7	5	6	3	1	2	4	5	0	1	1	1
855	Riding or school lessons		3	0	1	0	0	0	0	0	0	0	0	0	0	1	1	1	1	1	1	1	0	1	0	2	0	0	1	2	2	1	1													1	1	1	1
856			3	0	0	0	0	0	0	0	0	0	0	1	1	1	0	0	0	0	0	1	0	0	0	1	1	1	0	0	3	0	0	1	7	3	5	4	2	6	4	2	1	3	5	1	0	0	0
857	Other, please list:	working cattle	0	3	2	0	0	1	1	1	1	1	0	0	0	1	1	0	1	1	0	0	0	0	0	0	1	1	1	0	0	3	4	2	3	1	5	7	6	4						0	0	0	0
858	Companionship (eg. Retired horse, etc.)		4	0	1	0	0	0	0	0	0	0	0	0	0	1	1	1	1	1	1	1	0	0	0	0	1	0	1	0	3	1	0	4	5	2	3	7	1	6	2	4	5	3	1	1	1	1	1
859			2	1	1	0	0	0	0	0	0	2	2	0	0	1	1	1	1	1	1	1	0	0	1	1	1	0	1	3	1	0	0	6	5	1	2	7	4	3	3	2	1	4	5	1	1	1	1
860																	0	0	0	0	0	0	0	0	0																					0	0	0	0
862	Non-racing competition		2	0	0	0	0	0	0	0	0	1	0	0	0	1	1	1	1	1	1	1	1	0	0	1	1	2	2	0	2	1	1	6	4	5	2	7	1	3	4	3	1	2	5	1	1	0	1
863	Non-racing competition		2	1	4	0	0	0	0	2	3	3	3	3	3	1	0	0	1	0	0	1	0	0	0	0	2	2	0	4	2	2	2	5	3	4	6	1	2	7	1					1	1	1	1
864	Pleasure or trail riding		4	0	0	0	0	0	0	0	0	0	0	0	0	1	0	1	0	1	0	1	0	0	0	0	1	0	0	2	0	1	0	2	6	1	3	7	4	5	1	4	5	3	2	0	1	0	1
865	Non-racing competition		2	1	2	0	0	0	0	0	3	3	1	2	1	1	0	0	0	0	0	1	0	0	0	1	1	2	2	0	2	1	1	5	6	1	4	7	2	3	1	3	2	4	5	1	0	0	0
866	Pleasure or trail riding		0	0	0	0	0	0	0	0	0	0	0	0	0	1	0	1	0	1	0	1	0	0	0	0	2	0	1	2	2	0	0	1	7	4	3	6	2	5	1	3	4	5	2	0	0	1	1
867	Pleasure or trail riding		4	0	0	0	0	0	0	0	0	0	0	0	0	1	1	1	1	1	1	1	0	0	0	0	0	0	0	0	0	0	0	5	1	4	2	7	3	6	1	3	2	4	5	1	1	1	1
868	Pleasure or trail riding		0	0	0	0	0	0	0	0	2	0	0	0	0	1	1	1	0	1	1	1	0	0	0	0	2	1	1	4	1	2	2	1	5	3	6	7	2	4	1	3	2	5	4	0	1	0	1
870	Pleasure or trail riding		1	1	1	0	0	0	0	0	1	1	1	1	1	1	0	0	1	1	0	1	0	0	0	2	1	1	1	3	1	1	1	2	3	1	4	7	5	6	1	5	2	3	4	1	1	1	1
872			4	0	0	0	0	0	0	0	0	0	0	0	0	1	0	1	0	0	0	1	0	0	0	1	1	1	1	0	3	1	0	6	5	4	3	1	2	7	5	3	1	2	4	1	1	0	1
873																	0	0	0	0	0	0	0	0	0																					0	0	0	0
874	Work (eg. Ranching, logging, outfitting, etc.)		1	0	2	0	0	0	0	0	0	2	1	1	2	1	0	1	1	1	0	1	0	0	0	1	0	0	1	1	0	0	0	5	3	2	1	7	6	4	1	3	5	2	4	1	1	0	1
875	Riding or school lessons		1	0	0	0	0	0	0	2	1	0	0	0	0	1	1	1	1	1	1	1	0	0	0	0	0	0	0	0	0	0	0	5	6	1	4	7	3	2	4	1	2	3	5	1	1	1	1
876			1	0	1	0	0	0	1	2	1	3	1	2	1	1	0	1	0	1	0	1	0	0	0	1	1	1	1	1	2	3	2	2	4	1	3	7	6	5	1	5	4	3	2	1	1	1	1
877			1	0	0	0	0	0	0	1	1	1	0	0	1	1	0	0	1	0	0	1	0	0	0	2	1	0	0	1	2	0	0	2	4	1	3	6	7	5	1	2	4	5	3	1	1	0	1
878	Pleasure or trail riding			0	0	0	0	0	0	0	0	0	0	0	0	1	1	1	1	1	1	1	0	0	0	0	0	0	0	0	0	0	0	5	6	2	1	4	3	7	1	4	5	2	3	1	1	1	1
879	Companionship (eg. Retired horse, etc.)		4	0	0	0	0	0	0	0	0	0	0	0	0	1	0	1	0	0	0	1	0	0	0	0	1	0	1	0	2	0	0	5	4	3	6	1	2	7	1	2	5	3	4	0	1	0	0
880	Pleasure or trail riding		1	1	2	1	1	1	1	2	1	1	1	1	1	1	0	0	0	0	0	1	0	0	0	1	2	2	2	0	3	1	1	3	5	6	7	1	2	4	1	4	5	3	2	0	1	0	1
884			2	1	1	0	0	0	0	2	2	2	2	2	2	1	1	0	0	1	0	1	0	0	0	0	1	0	2	3	2	2	0	5	2	1	4	7	6	3	4	1	5	2	3	1	1	0	1
885			2	0	0	0	0	0	0	0	0	0	0	0	0		0	0	0	0	0	0	0	0	0																					0	0	0	0
889	Racing competition		0	0	0	0	0	0	0	0	3	3	3	3	2	1	1	1	1	1	1	1	0	0	0	0	0	0	3	1	0	3	1	2	1	4	5	3	6	7	3	2	4	1	5	1	1	0	1
890	Other, please list:	Horse therapy	4	0	0	0	0	0	0	0	0	0	0	0	0	0	0	0	0	0	0	0	0	0	0																					0	1	0	1
891																	0	0	0	0	0	0	0	0	0																					0	0	0	0
892																	0	0	0	0	0	0	0	0	0																					0	0	0	0
893																	0	0	0	0	0	0	0	0	0																					0	0	0	0
895	Riding or school lessons		2	1	2	0	0	0	0	2	2	1	1	1	1	1	0	0	0	0	0	0	0	1	0	1	2	1	3	1	1	0	0	2	6	1	3	7	5	4	4	5	1	2	3	0	1	1	1
896	Pleasure or trail riding		1	1	3	0	0	0	0	1	1	1	0	0	1	1	0	0	0	0	0	0	1	0	0	1	3	0	3	2	2	2	0	4	5	1	6	3	2	7	1	4	5	2	3	0	1	0	1
897	Other, please list:	Helping others get the tools to work safely and soundly with their horses so that all suceed in their partnership and journey.	1	0	0	0	0	0	0	0	0	0	0	0	0	1	0	0	0	0	0	1	0	0	0	1	1	0	0	2		0	0	5	4	1	6	2	3	7	5	4	3	2	1	0	1	0	1
898	Riding or school lessons		2	0	0	0	0	0	0	0	0	0	0	0	0	1	0	1	1	1	1	1	0	0	0	0	0	0	0	0	0	2	2	4	7	1	5	6	3	2	4	3	5	2	1	1	1	0	1
899	Riding or school lessons		3	2	1	0	0	0	0	0	0	1	0	0	1	1	1	1	1	1	1	1	0	0	0	0	0	0	0	0	0	0	0	4	6	5	3	7	1	2	2	5	3	1	4	1	1	1	1
900																	0	0	0	0	0	0	0	0	0																					0	0	0	0
901	Pleasure or trail riding		2	1	1	0	0	0	0	0	0	2	2	2	2	1	0	0	0	0	1	1	0	0	0	0	0	0	1	2	0	0	0	4	6	1	3	7	2	5	1	5	4	3	2	1	1	1	1
902	Non-racing competition		2	1	3	0	0	0	0	2	2	0	2	2	2	1	1	1	1	1	1	1	0	0	0	1	2	1	1	2	1	1	1	5	7	2	4	3	1	6	1	3	2	4	5	1	1	0	0
903			0	4	4	0	0	0	0	0	4	4	4	4	4	1	1	1	1	1	1	1	0	0	0	0	0	0	2	3	1	2	3	2	3	1	4	5	6	7	3	5	1	2	4	0	0	1	0
905																	0	0	0	0	0	0	0	0	0																					0	0	0	0
906	Non-racing competition		2	1		0	0	0	0	0	2	1	1	1	2	0	0	0	0	0	0	0	0	0	0																					0	1	1	1
907	Pleasure or trail riding		1	1	3	0	0	0	0	2	1	1	0	0	1	1	0	0	0	0	0	0	1	0	0	1	3	1	4	2	2	0	0	2	5	1	3	7	4	6	1	3	2	4	5	1	1	1	1
909	Non-racing competition		3	0	0	0	0	0	0	0	1	2	0	0	1	1	0	0	0	0	0	0	1	0	0	0	2	1	3	2	2	1	0	2	3	1	7	6	5	4	1	2	4	3	5	1	1	1	1
912	Pleasure or trail riding		3	1	0	0	0	0	0		0	0	0	0	0	1	0	0	0	0	0	0	1	0	0	2	1	1	1	1	2	1	2	7	6	1	2	3	4	5	3	2	5	1	4	1	1	1	1
913	Non-racing competition		2	3	2	0	0	0	0	0	0	0	0	0	1	1	0	0	0	0	0	0	1	1	0	0	1	0	2	1	0	1	0	6	2	1	5	7	4	3	4	2	1	3	5	1	1	1	1
914	Pleasure or trail riding		2	0	0	0	0	0	0	0	0	0	0	1	1		0	0	0	0	0	0	0	0	0																					0	0	0	0
915	Riding or school lessons		3	1	1	0	0	0	2	1	2	3	3	2	2	1	1	0	0	1	0	1	0	0	0	2	1	1	1	0	2	1	1	4	3	1	2	7	6	5	1	5	3	4	2	0	1	0	1
917	Riding or school lessons																0	0	0	0	0	0	0	0	0																					0	0	0	0
918	Non-racing competition		0	3	4	0	0	1	1	1	3	3	3	3	3	1	0	0	1	0	0	0	1	1	0	1	1	0	0	4	1	3	1	2	3	1	5	7	6	4	1	5	3	4	2	1	1	0	1
919																	0	0	0	0	0	0	0	0	0																					0	0	0	0
920			0	4	4	0	0	0	0	2	2	1	1	2	2	1	0	0	1	1	0	1	0	0	0	0	1	1	1	4	0	1	1	1	5	3	4	7	6	2	3	1	2	4	5	1	1	0	1
921	Pleasure or trail riding		1	1	1	0	0	0	0	0	0	0	2	0	0	1	1	1	1	1	1	1	0	0	0	0	0	0	0	0	0	0	0	1	6	3	4	7	2	5	2	3	4	5	1	1	1	1	1
922			1	1	3	0	0	0	0	1	1	1	1	1	1	1	1	1	1	1	1	1	0	0	0	0	0	0	1	0	2	0	0	1	2	4	5	7	6	3	4	2	1	3	5	1	1	1	1
923	Breeding		0	3	3	1	1	1	1	1	2	1	1	1	2	0	0	0	0	0	0	0	0	0	0																					0	0	0	1
924	Other, please list:	showing also one retired companion	2	1	2	0	0	0	0	2		0	1	1	2	1	0	0	0	0	0	0	1	1	0																					0	0	0	0
925	Work (eg. Ranching, logging, outfitting, etc.)		0	3	4	1	1	1	3	3	3	3	3	3	2	1	0	0	0	0	0	0	1	0	0	1	2	1	1	2	0	1	1	2	4	3	6	7	5	1	2	4	3	1	5	0	0	0	0
926	Companionship (eg. Retired horse, etc.)		0		1	0	0	1	0	2	2	1	0	0	2	1	0	0	1	0	0	1	0	0	0	0	2	0	1	1	1	2	1								3	1	2	4	5	1	1	0	1
927	Other, please list:	I HAVE A BREEDING FARM AND PRODUCE ARE TRAINED AND SHOWN	0	1	4	0	0	0	2	3	3	4	2	2	3	1	1	1	1	1	1	1	1	0	0	0	1	1	1	4	0	2	1	1	7	2	4	3	5	6	1	3	5	4	2	1	1	1	0
928	Pleasure or trail riding		1		1	0	0	0	0	0	0	2	0	0	0		0	0	0	0	0	0	0	0	0																					0	0	0	0
931	Pleasure or trail riding		1	1	2	0	0	0	0	0	0	0	0	0	0	1	0	0	0	0	0	0	1	0	0	0	0	0	1	4	0	2	0	2	4	1	6	7	3	5	1	2	5	3	4	1	1	1	1
932	Pleasure or trail riding		1	1	3	0	0	0	1	2	2	2	1	1	3	1	0	0	0	0	0	0	0	0	0	0	1	1	1	2	1	3	1	2	4	1	5	7	6	3						1	1	0	1
933	Pleasure or trail riding		1	1	2	0	0	0	0	0	1	1	1	1	2	1	0	0	0	0	0	0	1	0	0	1	0	0	1	2	1	0	0	4	6	2	7	1	3	5	2	4	1	3	5	1	1	1	1
934																	0	0	0	0	0	0	0	0	0																					0	0	0	0
935	Non-racing competition		0	4	4	0	0	0	0	3	3	3	1	1	1	1	0	0	0	0	0	0	1	0	0	0	2	1	3	4	0	3	4	2	1	4	6	7	5	3	2	3	1	4	5	1	0	0	0
936	Pleasure or trail riding		4	0	0	0	0	0	0	0	0	1	0	0	0	1	1	1	1	1	1	1	0	0	0	0	0	0	0	0	4	0	0	1	2	3	6	7	5	4	4	3	5	1	2	1	1	1	1
937	Pleasure or trail riding		1	1	2	0	0	0	0	0	0	0	0	0	2	1	1	1	1	1	1	1	0	0	0	0	0	0	0	0	0	0	0	4	2	1	3	7	6	5	1	3	2	4	5	1	1	1	1
938	Other, please list:	We do alot, compatition, ranching, trail ,breeding ..no one thing	0	3	2	0	0	0	0	0	0	0	0	0	1	0	0	0	0	0	0	0	0	0	0																					0	0	0	0
939	Pleasure or trail riding		1	1	2	0	0	0	0	1	1	0	0	0	1	1	1	0	1	1	1	1	0	0	0	0	1	1	0	0	0	0	0	2	6	3	4	7	1	5	2	4	3	5	1	0	1	0	1
940	Non-racing competition		2	1	1	0	0	0	0	2	2	0	0	0	1	1	0	0	0	0	0	0	1	0	0	0	0	1	3	3	0	2	2	2	4	1	5	7	6	3	1	3	4	5	2	1	1	1	1
941																	0	0	0	0	0	0	0	0	0																					0	0	0	0
943	Breeding		0	4	4	0	0	2	2	2	1	1	1	1	1	1	0	0	0	0	0	0	1	0	0	0	1	1	1	0	0	0	0													1	1	1	1
944	Other, please list:	Dressage, one currently in foal, bred for me.	1	0	1	0	0	1	0	0	0	2	2	0	1	1	0	0	0	0	0	0	1	0	0	1	1	1	1	2	2	1	1	6	4	5	2	3	1	7	1	5	4	3	2	1	1	1	1
948	Horse therapy or rehabilitation		1	0	1	0	0	0	0	0	0	0	0	0	0	1	0	1	1	1	0	1	0	0	0	0	0	0	1	2	1	0	0	2	6	3	7	5	1	4	3	2	1	4	5	1	1	1	1
949	Pleasure or trail riding		4	0	0	0	0	1	2	1	2	2	0	1	2	1	0	0	0	0	0	0	1	1	0	0	0	0	4	2	2	0	0	4	5	2	1	7	6	3	2	1	5	4	3	1	1	0	1
950	Other, please list:	Companionship, then pleasure/trail riding.	2	0	0	0	0	0	0	0	0	0	0	0	0	1	1	1	1	1	1	1	0	0	0	0	2	0	2	0	2	0	0	3	4	1	2	7	6	5	3	2	1	5	4	1	1	0	1
951	Non-racing competition		2	0	0	0	0	0	0	0	0	0	0	0	0	1	1	0	0	0	1	1	0	0	0	0	0	0	0	0	0	0	0	1	3	2	5	7	4	6	3	2	1	4	5	1	1	1	1
952	Pleasure or trail riding		1	1	1	0	0	0	0	0	0	0	0	0	2	1	1	1	1	1	1	1	1	0	0	1	1	0	1	1	0	2	1	2	6	1	4	7	3	5	4	2	1	5	3	1	1	1	0
953	Pleasure or trail riding		2	1	3	0	0	0	0	0	0	0	0	0	1	1	1	1	1	1	1	1	0	0	0	0	0	0	0	0	2	1	1	3	2	1	4	7	6	5	1	2	3	5	4	1	1	1	1
954	Pleasure or trail riding		3	1	2	0	0	0	0	0	0	0	0	0	1	1	1	1	1	1	1	1	0	0	0	1	2	0	2	1	0	1	1	3	6	1	4	7	5	2	1	5	2	3	4	0	1	1	1
955	Non-racing competition		0	0	0	0	0	0	0	0	1	1	0	1	0	1	1	1	1	1	1	1	0	0	0	0	1	0	0	0	0	0	0	3	5	1	6	7	2	4	3	2	1	4	5	1	1	0	0
956	Pleasure or trail riding		0	1	4	0	0	0	0	2	1	1	0	0	2	1	0	0	0	0	0	0	1	0	0	1	1	0	1	2	1	2	2	7	6	2	3	4	5	1	3	2	5	4	1	0	1	1	1
958	Pleasure or trail riding		3	1	1	0	0	0	0	0	2	2	1	0	2	1	1	0	0	1	0	1	0	0	0	1	2	1	1	1	1	1	1	3	5	1	4	7	6	2	1	4	5	3	2	1	1	1	1
959	Other, please list:	could be work which includes pleasure and companionship	1	1	1	1	1	1	1	1	1	1	1	1	1	1	1	1	1	1	1	1	0	0	0	0	0	0	0	1	0	1	0	6	5	3	2	7	4	1	2	3	1	4	5	0	1	1	0
960																	0	0	0	0	0	0	0	0	0																					0	0	0	0
961	Pleasure or trail riding		0	2	4	0	0	0	0	0	1	2	0	1	2	1	0	0	0	0	0	1	0	0	0	0	0	0	0	1	0	0	0	3	2	1	7	6	5	4	1	3	2	4	5	0	1	0	0
962	Riding or school lessons																0	0	0	0	0	0	0	0	0																					0	0	0	0
963	Companionship (eg. Retired horse, etc.)		0	0	0	0	0	0	0	0	0	0	0	0	0		0	0	0	0	0	0	0	0	0																					0	0	0	0
964	Other, please list:	trails and drill team	1	3	4	1	1	1	1	1	3	3	1	3	3	1	0	0	1	0	0	0	0	0	0	0	0	0	0	3	1	1	1	2	3	1	6	7	4	5	2	3	5	4	1	0	0	0	1
965			1	1	1	0	0	1	1	1	1	2	2	2	3	1	0	0	1	0	1	0	0	0	0	2	1	1	1	3	1	1	1	5	4	2	6	1	7	3	2	4	5	3	1	1	1	0	1
966			0	0	1	0	0	0	0	0	0	0	0	0	2	1	1	1	1	1	1	1	0	0	0	0	1	0	0	2	0	2	2	2	5	1	4	7	6	3	1	4	5	3	2	0	1	0	1
967	Pleasure or trail riding		3	1	1	0	0	0	0	0	0	0	0	0	1	1	1	1	0	1	1	1	0	0	0	0	1	0	0	0	0	0	0	1	3	4	5	7	6	2	1	5	4	2	3	1	1	1	1
968																	0	0	0	0	0	0	0	0	0																					0	0	0	0
969	Pleasure or trail riding		3	1	1	0	0	0	0	0	0	0	0	0	0	1	1	1	1	1	1	1	0	0	0	1	1	1	1	1	2	1	1	4	5	3	2	7	1	6	1	3	2	5	4	1	1	1	1
970	Pleasure or trail riding		2	0	1	0	0	0	0	1	1	1	0	0	1		0	0	0	0	0	0	0	0	0																					0	0	0	0
971	Non-racing competition		0	4	4	0	0	0	0	1	1	4	0	0	1	1	1	1	1	1	1	0	0	0	0	0	1	0	1	4	0	4	4	3	1	4	6	7	2	5	1	3	4	2	5	0	0	1	1
972	Companionship (eg. Retired horse, etc.)		0	1	1	1	1	1	1	1	1	1	1	1	1	1	0	0	0	0	0	0	0	1	0	1	1	0	0	1	1	2	2	5	3	1	7	2	4	6	1	3	5	2	4	0	1	0	0
973																	0	0	0	0	0	0	0	0	0																					0	0	0	0
974	Pleasure or trail riding		0	3	4	0	0	0	0	0	2	0	4	1	2	1	1	0	0	0	1	1	0	0	0	1	2	1	1	3	2	3	2													1	1	0	1
975			3	0	0	0	0	0	0	0	0	0	0	0	0		0	0	0	0	0	0	0	0	0																					0	0	0	0
977	Riding or school lessons		4	1	2	0	0	0	0	0	0	0	0	0	1	1	1	0	0	1	0	1	0	0	0	0	1	1	1	0	2	0	0	4	6	3	1	7	2	5	4	2	1	3	5	1	1	1	1
978	Work (eg. Ranching, logging, outfitting, etc.)		0	1	3	0	0	0	0	0	0	0	0	0	2	1	1	1	1	1	1	1	0	0	0	1	1	0	0	3	0	3	3	6	4	1	2	5	3	7	3	4	5	1	2	0	1	0	0
979	Riding or school lessons		3	1	1	0	0	0	0	0	0	0	1	0	1	1	0	1	1	1	1	1	0	0	0	0	1	1	1	0	3	0	0	4	7	3	2	6	1	5	3	2	1	4	5	1	1	1	1
980	Pleasure or trail riding		1	0	0	0	0	0	0	1	1	1	1	1	0	1	0	1	0	0	1	1	0	0	0	2	1	0	2	3	3	1	1													1	1	1	1
982	Companionship (eg. Retired horse, etc.)		3	0	0	0	0	0	0	0	0	0	0	0	0		0	0	0	0	0	0	0	0	0																					0	0	0	0
983	Non-racing competition		4	0	0	0	0	0	0	0	0	0	0	0	0	1	0	1	0	0	1	1	0	0	0	1	3	1	2	0	2	1	0	1	2	4	5	7	3	6	2	4	1	3	5	1	1	0	1
985	Other, please list:	non-riding pleasure (ie, development of horse confidence and ability)															0	0	0	0	0	0	0	0	0																					0	0	0	0
986	Pleasure or trail riding		0	4	4	0	0	1	1		4	4	1	2	4	1	1	1	1	1	1	1	0	0	0	0	1	2	1	4	1	2	1	3	2	1	7	5	6	4	1	2	4	5	3	1	1	1	1
988	Pleasure or trail riding		3	0	3	0	0	0	0	0	2	2	1	1	2		0	0	0	0	0	0	0	0	0																					0	0	0	0
989	Pleasure or trail riding		4	3	1	0	0	0	0	0	1	0	0	1	2	1	1	0	1	1	0	1	0	0	0	0		0	1	0	2	0	0	2	5	1	3	7	6	4	1	5	2	4	3	0	1	1	1
990																	0	0	0	0	0	0	0	0	0																					0	0	0	0
993	Companionship (eg. Retired horse, etc.)		1	1	3	0	0	0	0	0	3	4	4	4	4	1	1	1	1	1	1	1	0	0	0	0	0	0	0	0	0	0	0	5	3	1	2	7	4	6	1	2	5	3	4	0	1	1	1
994	Companionship (eg. Retired horse, etc.)		3	1	1	0	0	1	1	1	3	1	1	1	3	1	0	0	0	0	0	1	0	0	0	0	4	2	1	0	4	0	0	1	4	7	6	3	5	2	3	4	1	5	2	1	1	1	1
995	Racing competition		1	0	0	0	0	0	0	0	2	2	2	1	1	1	1	1	1	1	1	1	0	0	0	0	1	0	1	0	0	0	0	1	6	2	3	7	5	4	1	4	2	5	3	1	1	1	1
996	Racing competition		2	1	1	0	0	2	2	2	1	1	2	1	2	1	0	0	0	0	1	1	0	0	0	1	1	1	2	1	1	1	1	3	6	1	2	7	5	4	4	2	1	3	5	0	1	1	1
997																	0	0	0	0	0	0	0	0	0																					0	0	0	0
998			3	0	1	0	0	0	0	0	0	3	3	0	0	1	0	0	1	1	0	1	0	0	0	0	0	0	2	0	0	0	0	1	6	3	5	7	2	4	1	3	4	2	5	0	1	0	1
999																	0	0	0	0	0	0	0	0	0																					0	0	0	0
1000	Pleasure or trail riding		2	0	2	0	0	0	0	0	0	0	0	0	0		0	0	0	0	0	0	0	0	0																					0	0	0	0
1001	Pleasure or trail riding		1	1	1	0	0	0	0	0	0	0	0	0	0	1	1	1	1	1	1	1	0	0	0	0	1	2	1	1	1	2	0	1	2	3	5	7	4	6	2	3	4	1	5	0	1	1	1
1002	Pleasure or trail riding		1	0	0	0	0	0	0	0	0	0	0	0	0	1	1	1	0	1	0	1	0	0	0	1	2	1	1	0	3	0	0	5	1	7	6	3	2	4	3	2	5	4	1	0	1	1	0
1005	Pleasure or trail riding		2	0	0	0	0	0	0	0	0	0	0	0	0	1	0	1	0	0	0	1	0	0	0	1	1	1	1	0	2	1	1	1	2	4	6	7	3	5	1	4	5	2	3	1	1	1	1
1006																	0	0	0	0	0	0	0	0	0																					0	0	0	0
1008	Companionship (eg. Retired horse, etc.)		3	0	1	0	0	0	0	0	1	1	1	1	1	1	1	1	0	1	1	1	0	0	0	0	0	0	2	0	4	1	2	4	6	2	3	7	1	5	1	4	3	2	5	1	1	0	0
1009	Non-racing competition		2	0	0	0	0	0	0	0	0	0	0	0	1	1	0	0	0	1	0	1	0	0	0	1	1	1	1	0	3	1	1	3	6	7	4	2	1	5	4	2	1	3	5	1	1	1	1
1010	Riding or school lessons		1	0	0	0	0	0	0	0	0	0	0	0	0	1	0	0	0	1	0	1	0	1	0																					0	0	0	0
1011																	0	0	0	0	0	0	0	0	0																					0	0	0	0
1012	Other, please list:	I take in the problem horses, that are usually headed for auction	2	0	1	0	0	0	0	0	0	0	0	0	0	1	1	1	1	1	1	1	0	0	0	0	0	0	2	0		0	0	7	5	4	1	2	3	6	3	2	1	4	5	1	1	1	1
1013																	0	0	0	0	0	0	0	0	0																					0	0	0	0
1014	Pleasure or trail riding		4	0	0	0	0	0	0	0	0	0	0	0	0	1	0	0	0	0	0	1	0	0	0	0	2	1	1	0	0	0	0	1	4	2	6	3	5	7	1	2	3	4	5	0	1	0	1
1015	Riding or school lessons		4	0	0	0	0	0	0	0	0	0	0	0	0	1	1	1	1	1	1	1	0	1	0	0	0	0	0	0	4	0	0	2	3	7	6	4	1	5	2	3	1	5	4	1	1	1	1
1016			4	0	0	0	0	0	0	0	0	0	0	0	0	1	1	1	0	1	1	1	0	0	0	0				0	0	0	0	5	7	2	3	4	1	6	4	2	1	3	5	0	0	0	0
1017	Pleasure or trail riding		2	1	1	0	0	0	0	0	0	2	0	0	0	1	1	1	1	1	1	1	0	0	0	0	2	1	3	1	1	0	0								4	3	1	2	5	1	1	1	1
1018	Pleasure or trail riding		4	1	2	0	0	0	0	0	0	0	0	0	0	1	1	1	0	1	1	1	0	0	0	0	1	1	1	0	2	0	0													1	1	0	0
1019			4	0	0	0	0	0	0	0	0	0	0	0	0	1	1	1	1	1	1	1	1	1	0	0	1	0	1	0	3	0	0	4	5	2	1	7	3	6	1	3	2	4	5	1	1	1	1
1020	Other, please list:	We have rescue horses that are in rehab as well.	0	0	1	0	0	0	0	0	0	0	0	0	0	1	0	0	0	0	0	0	1	0	0	1	1	0	1	2	2	0	0													1	1	0	1
1021			4	0	0	0	0	0	0	0	0	1	1	0	0		0	0	0	0	0	0	0	0	0																					0	0	0	0
1022	Companionship (eg. Retired horse, etc.)		3	2	2	0	0	0	0	0	0	3	0	0	0	1	1	1	1	1	1	1	0	0	0	0	0	0	0	0	0	0	0	1	6	2	4	7	5	3	4	3	2	1	5	1	1	1	1
1023	Pleasure or trail riding																0	0	0	0	0	0	0	0	0																					0	0	0	0
1024																	0	0	0	0	0	0	0	0	0																					0	0	0	0
1026	Pleasure or trail riding		0	0	0	0	0	0	0	1	1	1	0	1	1	1	0	0	0	0	0	0	1	0	0	1	3	1	0	2	0	1	1	2	5	1	3	7	4	6	1	4	5	2	3	1	1	1	1
1027			4	0	0	0		0	0	0	0	1	1	0	0	1	1	1	1	1	1	1	1	0	0	0	2	1	1	0		1	1	4	5	2	3	6	1	7	1	5	4	3	2	1	1	1	1
1028	Pleasure or trail riding		1	0	0	0	0	0	0	0	0	0	0	0	0	1	0	0	0	1	0	1	0	0	0	0	0	0	0	0	0	0	0	4	3	1	2	7	5	6	4	3	1	2	5	1	1	0	0
1029	Riding or school lessons		1	0	0	0	0	0	0	1	1	0	0	1	2	1	1	1	1	1	1	1	0	0	0	0	0	0	1	0	2	1	1	4	5	3	6	1	2	7	4	2	1	3	5	1	1	1	0
1030	Pleasure or trail riding																0	0	0	0	0	0	0	0	0																					0	0	0	0
1031	Non-racing competition		4	1	1	0	0	0	0	0	0	0	0	0	0	1	1	1	1	1	1	1	0	0	0	0	2	2	1	0	0	0	0													0	1	0	1
1032	Non-racing competition		1	0	1	0	0	0	0	0	0	0	0	0	0	1	1	1	1	1	1	1	0	0	0	1	1	1	2	2	1	1	1													1	1	1	1
1033	Other, please list:	pleasure riding, trails, backcountry, arena learning	4	0	0	0	0	0	0	0	0	0	0	0	0		0	0	0	0	0	0	0	0	0																					0	0	0	0
1034	Other, please list:	Pleasure riding And companionship.	4	0	0	0	0	0	0	0	0	0	0	0	0	1	1	1	1	1	1	1	0	0	0	0	0	0	0	0	1	0	0	5	6	3	2	4	1	7	1	5	4	3	2	0	0	1	1
1035																	0	0	0	0	0	0	0	0	0																					0	0	0	0
1036	Riding or school lessons		0	0	1	0	0	0	0	0	0	3	1	1	2	1	1	1	1	1	1	1	0	0	0	1	0	0	1	1	3	0	0	3	5	4	2	7	6	1	2	3	4	5	1	1	1	0	0
1037	Pleasure or trail riding		1	2	4	1	1	1	1	1	1	1	1	1	1	1	1	1	1	1	1	1	0	0	0																					0	0	0	0
1038	Pleasure or trail riding		2	1	0	0	0	0	0	0	0	0	0	0	0	1	1	1	0	0	1	1	0	0	0		1	1	1	2	2	0	0													1	1	0	0
1039																	0	0	0	0	0	0	0	0	0																					0	0	0	0
1040	Pleasure or trail riding		4	1	0	0	0	0	0	0	0	0	0	0	0	1	1	1	1	1	1	1	0	0	0	1	2	2	1	0	4	0	0	2	5	4	7	6	1	3	5	2	1	3	4	1	1	1	1
1041	Riding or school lessons		2	0	1	0	0	0	0	0	0	1	1	0	0	1	1	1	0	0	1	1	0	0	0	0	1	1	1	0	0	0	0													1	1	0	1
1042	Pleasure or trail riding		4	0	0	0	0	0	0	0	0	0	2	0	0	1	0	0	0	0	0	0	0	0	0	2	2	1	2	0	4	0	0	4	6	2	3	7	1	5	3	4	5	2	1	0	1	1	1
1043	Pleasure or trail riding		1	0	0	0	0	0	0	0	0	0	0	0	0	1	1	1	1	1	1	1	0	0	0	0	0	0	0	0	0	0	0													1	1	1	1
1044	Riding or school lessons		2	0	0	0	0	0	1	0	0	0	1	0	0	1	0	0	0	1	0	1	0	0	1	0	0	0	1	0	1	0	0	7	6	2	3	5	1	4	3	2	1	5	4	0	0	0	0
1045	Riding or school lessons		1	1	1	0	0	0	0	0	0	0	0	0	0	1	0	0	0	0	0	1	0	0	0	0	2	1	1	1	2	0	0								5	2	1	4	3	1	1	0	1
1046	Riding or school lessons		1	1	1	0	0	0	0	0	0	1	0	0	0		0	0	0	0	0	0	0	0	0																					0	0	0	0
1047	Breeding		4	0	0	0	0	0	0	0	0	0	0	0	0	1	0	0	0	0	0	1	0	0	0	1	1	1	1	0	2	0	0	6	7	5	4	2	1	3	3	4	1	5	2	0	1	0	0
1048	Pleasure or trail riding		1	1	3	1	0	2	1	1	1	1	1	1	2	1	1	1	1	1	1	1	0	0	0	2	3	1	1	3	1	1	1	4	5	3	2	6	1	7	4	2	1	3	5	1	1	1	1
1051	Pleasure or trail riding		2	1	1	0	0	0	0	0	0	0	0	0	0	1	1	1	1	1	1	1	0	0	0	0	2	1	1	0	4	0	0	6	4	2	1	3	5	7	1	4	5	2	3	1	1	1	0
1052	Pleasure or trail riding		3	1	1	0	0	0	0	0	2	2	3	1	0	1	0	1	1	1	0	1	0	0	0	1	3	1	2	0	3	0	0													0	1	0	0
1054	Riding or school lessons		2	0	1	0	0	0	0	0	0	0	0	0	0	1	1	1	1	1	1	1	0	0	0	0	1	0	0	0	0	0	0	5	4	1	2	7	6	3	2	4	5	3	1	0	1	0	1
1055			4	0	0	0	0	0	0	0	0	0	0	0	0	1	1	1	1	1	1	1	0	0	0	0	0	0	0	0	2	0	0	2	5	6	4	7	1	3	4	3	2	5	1	1	1	1	1
1056	Work (eg. Ranching, logging, outfitting, etc.)		0	4	2	0	0	1	0	1	2	2	0	0	0	1	1	0	0	0	0	0	0	0	0	0	3	0	0	4	0	2	0	1	3	2	4	7	5	6	1	3	4	5	2	0	1	0	1
1060	Other, please list:	I have several horses two of which are chore horses, my other horses are used fro pleasure, trail and occasionally non racing competition	0	0	0	0	0	0	0	0	0	0	0	0	0	1	1	1	1	1	1	1	0	0	0	0	0	0	1	0	0	0	0	7	4	6	1	3	2	5	1	4	5	2	3	0	1	0	1
1061	Pleasure or trail riding		0	1	4	0	0	0	0	0	0	0	1	0	0	1	1	1	1	1	1	1	0	0	0	0	1	0	0	1	0	1	1	1	7	2	6	3	4	5	1	2	5	3	4	1	1	1	1
1063	Pleasure or trail riding		1	2	4	0	0	1	1	1	2	3	1	1	4	1	0	0	0	0	0	0	0	0	0	1	1	0	1	4	1	2	1													1	1	1	1
1064	Riding or school lessons		0	4	4	0	0	0	0	0	2	2	0	0	3	1	1	1	1	1	1	1	0	0	0	1	1	1	1	2	1	1	1	1	5	2	6	7	4	3	2	1	3	4		0	1	1	1
1066			1	1	4	0	0	0	0	0	0	0	0	0	0	1	1	1	1	1	1	1	1	0	0																					0	0	0	0
1067	Pleasure or trail riding																0	0	0	0	0	0	0	0	0																					0	0	0	0
1068	Other, please list:	Hunter / jumper training	2	0	0	0	0	0	0	0	0	2	0	0	0	1	1	1	1	1	1	1	0	0	0	0	0	1	1	2	2	0	0	3	6	4	2	7	1	5	4	1	2	3	5	1	1	1	1
1070	Riding or school lessons		0	0	0	0	0	0	0	0	0	1	0	0	1	1	0	0	0	0	0	1	0	0	0	0	0	0	0	0		0	0	6	5	7	3	2	4	1	4	2	3	1	5	0	1	0	1
1071	Non-racing competition		0	1	0	0	1	0	1	1	0	0	1	1	0	1	0	0	0	0	0	0	0	0	0	2	3	1	2	4	2	1	0	3	2	4	6	7	1	5	4	3	2	1	5	0	1	0	1
1072																	0	0	0	0	0	0	0	0	0																					0	0	0	0
1073	Riding or school lessons		3	1	2	0	0	0	0	1	1	1	0	0	1	1	1	1	0	1	0	1	0	0	0	0	1	0	1	1	3	1	0	1	5	2	3	7	4	6	3	4	1	2	5	1	1	1	1
1074	Non-racing competition		3	1	1	1	1	1	1	1	0	0	0	1	0	1	0	1	0	1	0	1	0	0	0	0	0	0	0	2	0	1	1	4	6	1	7	5	2	3	1	4	5	3	2	0	0	1	1
1077																	0	0	0	0	0	0	0	0	0																					0	0	0	0
1078			1	2	3	0	0	2	0	2	1	4	3	2	3	1	1	1	1	1	0	1	0	0	0	1	1	0	0	2	1	1	1													1	0	1	1
1079																	0	0	0	0	0	0	0	0	0																					0	0	0	0
1080	Pleasure or trail riding																0	0	0	0	0	0	0	0	0																					0	0	0	0
1081	Pleasure or trail riding		3	0	0	0	0	0	0	0	0	0	0	0	2	1	1	1	1	1	1	1	1	0	0	0	0	0	0	0	2	0	0	4	2	1	3	6	5	7	5	1	2	3	4	1	0	0	0
1082	Non-racing competition		2	1	1	0	0	0	0	0	0	0	0	0	0	1	1	1	1	1	1	1	0	0	0	1	1	0	1	1	3	1	0	6	3	2	4	7	1	5	3	2	1	4	5	1	1	0	1
1083	Companionship (eg. Retired horse, etc.)		0	0	0	0	0	0	0	0	0	0	0	0	0	1	1	1	1	1	1	1	0	0	1	0	0	0	0	0	0	0	0	3	6	2	4	7	5	1	5	2	1	4	3	1	1	1	1
1084	Pleasure or trail riding																0	0	0	0	0	0	0	0	0																					0	0	0	0
1085	Riding or school lessons		4	1	1	0	0	0	0	0	0	0	0	0	0	1	0	0	0	0	0	1	0	1	0	0	1	1	1	0	4	1	1	2	5	3	4	7	6	1	5	4	3	2	1	0	1	0	1
1086	Pleasure or trail riding		0	3	3	0	0	0	2	0	2	2	2	2	1	0	0	0	0	0	0	0	0	0	0																					0	1	0	0
1088	Pleasure or trail riding																0	0	0	0	0	0	0	0	0																					0	0	0	0
1090	Riding or school lessons		2	1	0	0	0	0	0	0	0	0	0	0	0	1	1	1	0	1	1	1	0	0	0	1	1	1	3	0	0	0	0	1	6	5	2	7	3	4	4	1	2	3	5	0	1	0	1
1091	Non-racing competition		3	0	1	0	0	0	0	0	1	0	0	1	1	1	1	1	1	1	1	1	0	0	0	0	1	1	1	0	4	0	0													0	1	0	1
1092	Non-racing competition		1	1	0	0	0	0	0	1	1	0	0	0	1	1	1	1	0	1	0	1	0	0	0	1	1	0	1	0	2	0	0	5	4	3	2	7	1	6	3	2	1	4	5	1	1	0	1
1094	Pleasure or trail riding		2	0	1	0	0	0	0	0	0	0	0	0	0	1	1	1	1	1	1	1	0	0	0	1	2	0	0	0	4	2	1	2	7	3	5	6	1	4	1	4	2	3	5	1	1	1	1
1096	Non-racing competition		2	1	2	0	0	0	0	0	2	1	1	1	3	1	1	1	1	1	1	1	0	0	0	0	1	1	3	3	3	1	1	2	4	3	5	6	1	7	1	2	4	5	3	0	1	1	1
1097																	0	0	0	0	0	0	0	0	0																					0	0	0	0
1098	Horse therapy or rehabilitation		0	0	1	0	0	0	0	0	0	0	0	0	0	1	0	0	0	0	0	1	0	0	0	0	3	3	0	3	3	0	0													1	1	0	0
1099	Non-racing competition																0	0	0	0	0	0	0	0	0																					0	0	0	0
1100	Breeding		3	1	0	0	0	0	0	0	0	0	0	0	0	1	0	0	0	0	0	1	0	1	0	0	1	0	2	2	2	1	0	3	2	1	4	7	5	6	1	5	2	3	4	1	1	0	1
1101			1	1	1	0	0	0	0	3	3	3	3	3	3	1	0	0	0	0	0	0	1	0	0	0	0	0	2	1	1	3	3													1	1	1	1
1102	Pleasure or trail riding		1	0	0	0	0	0	0	0	0	2	2	0	0	1	0	0	0	0	0	0	1	0	0	0	1	0	1	0	1	0	0	3	4	2	7	6	1	5	2	3	1	4	5	1	1	1	1
1103	Pleasure or trail riding																0	0	0	0	0	0	0	0	0																					0	0	0	0
1104	Pleasure or trail riding		2	1	3	0	0	0	0	0	0	0	0	0	0	1	1	1	0	1	0	1	0	0	0	0	2	1	2	1	2	1	1	2	5	4	1	7	3	6	1	4	3	2	5	1	1	0	1
1105	Horse therapy or rehabilitation		1	0	0	0	0	0	0	0	0	0	0	0	0		0	0	0	0	0	0	0	0	0																					0	0	0	0
1106	Pleasure or trail riding		4	0	0	0	0	0	0	0	0	0	0	0	0	1	1	1	1	1	0	1	0	0	0	0	2	0	2	1	1	0	0	3	2	1	4	7	5	6	3	2	1	5	4	1	1	1	1
1107			1	0	0	0	0	0	0	0	0	0	0	0	0		0	0	0	0	0	0	0	0	0																					0	0	0	0
1108	Pleasure or trail riding																0	0	0	0	0	0	0	0	0																					0	0	0	0
1109			1	1	2	0	0	0	0	2	3	3	0	2	2		0	0	0	0	0	0	0	0	0																					0	0	0	0
1110	Pleasure or trail riding		0	4	4	0	0	0	2	1	4	3	4	2	3	0	0	0	0	0	0	0	0	0	0																					0	1	0	0
1111	Riding or school lessons		1	1	1	0	0	0	0	0	0	0	0	0	0	1	1	1	1	1	1	1	0	0	0	0	0	0	0	0	0	0	0	4	6	1	7	3	2	5	1	3	2	4	5	1	1	1	1
1112	Pleasure or trail riding		0	0	2	0	0	0	0	0	0	0	0	0	1	1	1	1	1	1	1	1	0	0	0	0	3	0	1	0	4	0	0	4	6	2	3	1	5	7	1	4	3	2	5	1	1	1	1
1113	Breeding		2	1	2	0	0	0	0	0	0	0	0	0	1	1	0	0	0	0	0	0	0	1	0	1	1	0	2	2	0	2	2	6	5	1	4		2	3	1		2	4	3	0	1	1	1
1114	Other, please list:	Mostly retired due to racing injuries (rescue horse) very occasional trail ride	2	1	0	0	0	0	0	0	0	0	0	0	0	1	1	0	0	1	0	1	1	0	0	0	1	1	1	1	0	0	2	3	4	6	2	7	1	5	2	4	5	3	1	0	1	0	0
1115	Riding or school lessons		1	1	1	0	0	0	0	0	0	0	0	0	0		0	0	0	0	0	0	0	0	0																					0	0	0	0
1116	Riding or school lessons		1	0	1	0	0	0	0	0	0	0	0	0	1	1	1	1	1	1	1	1	0	0	0	0	0	0	1	0	0	0	0	1	6	4	2	7	5	3	2	3	1	5	4	1	1	0	0
1117	Non-racing competition		0	0	0	0	0	0	0	0	0	0	0	0	0		0	0	0	0	0	0	0	0	0																					0	1	0	0
1118	Other, please list:	Competition horse for another rider	2	1	1	0	0	0	0	0	0	0	1	0	1	1	0	0	0	0	1	1	0	0	0	0	1	0	1	3	1	2	2	5	4	1	7	2	3	6	1	4	3	5	2	0	1	0	1
1119	Other, please list:	Competing in show jumping	3	0	2	0	0	0	0	1	2	2	2	0	0	1	1	1	1	1	1	1	0	0	0	2	2	0	3	0	0	0	0	2	5	1	4	7	6	3	1	4	3	5	2	1	1	0	1
1120	Other, please list:	Training/Starting young horses. Some for resale.	1	1	1	0	0	0	0	1	1	0	0	1	1	1	0	0	0	0	0	0	1	0	0	1	1	1	1	3	1	1	1	3	6	1	5	7	2	4	2	3	4	1	5	0	0	0	0
1121	Pleasure or trail riding		1	2	2	0	0	0	0	2	2	1	2	2	2	1	0	0	0	0	0	0	0	0	0	1	2	1	1	2	1	2	2													0	1	0	0
1122	Non-racing competition		3	0	0	0	0	0	0	0	0	0	0	0	0	1	0	0	0	0	0	1	0	0	0	0	1	1	1	0	4	0	0	1	6	2	4	7	5	3	5	4	3	2	1	1	1	1	1
1123	Pleasure or trail riding			0		0	0	0	0	0	0	0	0	0	0	1	0	0	0	1	0	1	0	0	0	0	1	0	0	0	1	0	0													1	1	1	1
1124	Pleasure or trail riding		2	1	2	0	0	0	0	0	2	2	0	2	2	1	0	0	1	0	0	1	0	0	0	0	1	1	1	2	1	2	1	4	2	5	7	1	6	3	2	4	1	3	5	1	1	1	1
1125	Non-racing competition		0	4	3	0	0	0	0	0	0	0	0	0	2	1	0	0	0	0	0	1	0	0	0	0	1	1	1	1	1	1	1	2	4	3	5	6	7	1	5	2	3	1	4	0	1	1	0
1126	Pleasure or trail riding		1	0	0	0	0	0	0	0	0	0	0	0	0	1	1	1	1	1	1	1	0	0	0	0	1	0	3	0	2	0	0	4	2	1	3	7	6	5	3	2	1	4	5	1	1	0	0
1127	Other, please list:	Gymkhana	2	0	0	0	0	0	0	0	0	0	0	0	0	1	0	1	0	0	0	1	0	0	0	0	2	2	1	0	0	0	0													1	1	0	0
1129	Non-racing competition		3	1	1	0	0	0	0	0	0	0	0	1	1		0	0	0	0	0	0	0	0	0																					0	0	0	0
1131	Other, please list:	Distance RIDING	1	0	2	0	0	0	0	0	0	1	1	1	1	1	1	0	0	0	0	1	0	0	0	0	1	0	1	0	1	0	0	2	3	1	5			4	1	3	4	2	5	1	1	0	1
1132	Other, please list:	Hunter competition	4	0	0	0	0	0	0	0	0	0	0	0	0		0	0	0	0	0	0	0	0	0																					0	0	0	0
1133	Non-racing competition		0	0	2	0	0	0	0	0	3	3	2	0	2		0	0	0	0	0	0	0	0	0																					0	0	0	0
1134	Pleasure or trail riding		1	0	0	0	0	0	0	0	0	0	0	0	0	1	0	0	0	1	0	1	0	0	0	1	0	1	2	2	4	2	1	2	5	4	6	7	1	3	1	4	5	2	3	1	1	1	1
1135	Riding or school lessons		1	1	2	0	0	0	0	0	0	0	4	1	1	1	0	1	0	1	0	1	0	0	0	0	1	0	1		4	0	0	3	5	2	4	6	1	7	3	1	5	4	2	0	1	1	1
1136	Pleasure or trail riding		1	0	1	0	0	0	0	1	1	0	0	1	1	1	1	1	0	1	1	1	0	0	0	0	3	3	3	0	3	1	0	3	5	6	2	4	1	7	4	3	1	2	5	1	1	1	1
1137	Pleasure or trail riding		0	0	1	0	0	0	0	1	0	0	0	0	1	1	1	1	1	1	1	1	0	0	0	1	2	0	2	0	4	2	2	2	6	3	5	1	7	4	1	4	5	3	2	0	0	1	1
1138	Pleasure or trail riding		4	0	0	0	0	0	0	0	0	0	0	0	1	1	0	1	1	0	0	1	0	0	0	1	3	1	1	1	3	0	0	1	5	3	4	7	2	6	1	2	3	5	4	1	1	1	1
1140	Non-racing competition		3	0	0	0	0	0	0	0	0	2	0	0	0	1	0	0	0	0	1	1	0	0	0	0	0	1	0	0	2	0	0	6	5	4	2	1	3	7	3	2	4	5	1	0	1	0	1
1141	Non-racing competition		3	0	0	0		0	0	0	0	0	0	0	0	1	0	0	0	0	0	1	0	0	0	0	1	1	1	0	4	1	1	4	6	3	5	1	2	7	3	2	1	4	5	1	1	0	1
1143	Riding or school lessons		1	1	1	0	0	0	0	1	3	3	3	1	1	1	1	1	1	1	1	1	0	0	0	0	1	0	1	1	1	1	1	1	4	2	3	7	6	5	1	5	4	2	3	1	1	1	1
1144	Pleasure or trail riding		1	1	2	0	0	0	0	0	0	1	0	0	0	1	1	1	1	1	1	1	0	0	0	0	0	0	1	1	1	0	0	2	5	1	3	7	6	4	1	4	5	2	3	0	1	0	1
1145	Non-racing competition		0	0	1	0	0	0	0	0	0	2	2	0	0		0	0	0	0	0	0	0	0	0																					0	0	0	0
1146	Pleasure or trail riding		2	1	1	0	0	0	0	0	0	0	0	0	0	1	1	1	1	1	1	1	0	0	0	0	1	0	0	2	4	0	0	4	3	2	6	5	1	7	4	1	2	3	5	1	1	1	1
1147	Companionship (eg. Retired horse, etc.)		3	1	1	1	1	1	1	1	1	1	1	1	1	1	1	1	1	1	1	1	0	0	0	3	3	0	0	3	3	0	0	7	6	3	2	4	1	5	3	2	1	5	4	1	0	0	1
1148	Pleasure or trail riding		1	0	2	0	0	0	1	1	3	2	1	1	2		0	0	0	0	0	0	0	0	0																					0	0	0	0
1149	Pleasure or trail riding		0	1	2	0	0	0	0	0	0	0	0	0		1	1	1	1	1	1	1	0	0	0	0	0	0	0	0	0	0	0	3	6	1	4	7	5	2	1	4	5	3	2	1	1	1	0
1153	Companionship (eg. Retired horse, etc.)		0	1	4	0	0	0	0	0	0	0	0	0	0		0	0	0	0	0	0	0	0	0																					0	0	0	0
1155			2	1	1	0	0	0	0	0	0	0	0	0	0	1	1	1	1	1	1	1	0	0	0	1	1	1	2	1	2	2	2	1	5	2	3	7	4	6	1	5	3	4	2	0	1	1	1
1156	Pleasure or trail riding		1	0	0	0	0	0		0	0	0	0	0	0	1	0	1	0	1	0	1	0	0	0	1	1	0	1	0	2	2	2	2	3	1	4	6	7	5	2	4	5	3	1	1	1	0	1
1158			4	0	0	0	0	0	0	0	0	0	0	0	0	1	0	1	1	1	0	1	0	0	0	0	0	1	3	4	0	0	0	2	7	1	5	6	4	3	2	5	1	4	3	1	1	0	1
1159			1	1	1	1	1	1	1	1	1	1	1	1	1	1	0	1	0	0	0	1	0	0	0	1	2	0	2	0	0	0	1	2	5	7	3	4	1	6	1	4	5	3	2	0	1	0	1
1160	Pleasure or trail riding		1	1	1	0	0	0	0	0	0	0	0	0	1	1	1	1	1	1	1	1	0	0	0	1	2	1	1	0	4	1	1	2	5	3	6	7	1	4	1	5	4	3	2	1	1	1	1
1161	Riding or school lessons		0	0	0	0	0	0	0	0	1	0	0	1	2	1	0	0	0	0	0	0	1	0	0	1	1	1	1	1	0	0	0	4	7	1	6	3	2	5	1	4	5	3	2	1	1	0	1
1162	Pleasure or trail riding		2	1	3	0	0	0	1	1	1	0	1	0	1	1	1	1	0	1	1	1	0	0	0	0	2	0	1	0	2	0	0	1	2	6	7	5	4	3	3	2	1	5	4	1	1	0	1
1163	Pleasure or trail riding		1	3	3	0	0	0	0	0	0	0	1	0	0	1	0	1	0	0	0	1	0	0	0	0	0	0	1	2	1	0	0	5	4	3	1	6	2	7	1	4	5	2	3	0	1	0	1
1164	Pleasure or trail riding		1	0	2	0	0	0	0	0	1	0	0	1	1		0	0	0	0	0	0	0	0	0																					0	0	0	0
1165	Pleasure or trail riding		1	0	1	0	0	0	0	0	0	0	0	0	0		0	0	0	0	0	0	0	0	0																					0	0	0	0
1166			3	0	0	0	0	0	0	0	0	0	0	0	0	1	1	1	1	1	1	1	0	0	0	0	0	0	0	0	0	0	0	1	5	3	2	6	7	4	1	4	3	2	5	1	1	1	1
1167	Pleasure or trail riding		2	4	4	0	0	0	4	0	0	4	4	0	0	1	1	1	1	1	1	1	0	0	0	1	3	3	2	0	0	3	0	5	7	4	3	1	2	6	3	2	1	5	4	1	1	0	0
[truncated: 15 more columns]
